# Supplementary material for: Inference of Coalescence Times and Variant Ages Using Convolutional Neural Networks
Source: PubMed Central journal article supplement (PMC10581698; doi:10.1093/molbev/msad211), 2023-09-20
Supplement: msad211_supplementary_data.pdf [file msad211_supplementary_data.pdf]

Supplementary Information  
Inference of coalescence times and variant ages using convolutional neural  
networks

Juba Nait Saada, Zoi Tsangalidou, Miriam Stricker, Pier Francesco Palamara

# Supplementary Note

## Additional details on CoalNN’s network architecture

We apply a convolutional neural network on genomic windows of fixed length  $L$ , where  $L$  is the number of sites necessary to cover the first 10 centimorgans (cM) of Chromosome 2, since this provides a receptive field large enough to capture long identical-by-descent segments as explained in the interpretability section. We selected the beginning of Chromosome 2 as a representative region due to its recombination rate being close to the genome-wide average (1.66 cM per Mb in the first 30 Mb; mean = 1.45 cM per Mb, s.d. = 0.33 across the autosomes (Palamara et al., 2018)). We measure genomic regions using cM, rather than base pairs, to account for uneven recombination rates along the genome, as recombination is the primary determinant of changes in TMRCA. During training, recombination maps from different chromosomes are sampled at random to avoid overfitting to chromosome 2. Rather than using padding, we add a fixed amount of genomic data as context on either side of the input sequence, resulting in a region of length  $L_1 > L$ .

The genotype data provided in input to CoalNN is encoded as  $x_i$ ,  $i \in \{1, \dots, L_1\}$ , where  $x_i$  takes floating point values. For simulated SNP array and sequencing data  $x_i \in \{0, 1\}$  indicates whether the haploid individual carries an ancestral or a derived allele, while in experiments involving imputed data,  $x_i$  takes continuous dosage values in  $[0, 1]$ , reflecting imputation uncertainty. For binary data, we compute the AND and the XOR functions between the two haplotypes, which reflect the presence of mismatching or shared alleles, respectively. We also performed experiments in which we trained a model by providing the raw sequencing data as input directly, without applying the AND and XOR functions. For imputation experiments, we trialed two approaches: using the model trained on sequencing data after rounding the continuous dosage to binary values, or training a new model on dosages from simulated imputed data, allowing the network to take floating-point values in input.

We first apply a batch normalization layer and stack five convolution blocks (ConvBlocks), each consisting of a convolution layer, a batch normalization layer, and a ReLU activation function. The first convolution block aims to capture long-range dependencies by using a large kernel size while subsequent layers focus on smaller and smaller windows (kernel sizes of 701, 201, 51, 7, 3 respectively). These kernel sizes were chosen to allow the first layers of the network to have large receptive fields, without significantly increasing the number of trainable parameters. Since small TMRCA correspond to shared ancestry in the recent past, they are characterized by long (e.g.,  $> 1$  cM) and nearly identical haplotype segments. To capture these segments, we increased the receptive field of the network by utilizing a dilated convolution in the first block, which effectively enlarges the convolution kernel by inserting gaps between kernel elements (Yu and Koltun, 2015). The dilation factor is automatically tuned so that the receptive field approximately corresponds to the first 5 cM of Chromosome 2. A convolutional layer goes through all input channels in the previous layer and the number of channels in each layer is incrementally increased to allow for increasingly complex feature extraction. At the same time, since a convolution operation can be seen as summarizing nearby elements in the input, after each convolution block, the sequence length is reduced until ultimately reaching  $L$  ( $L_1 > L_2 > L_3 > L_4 > L_5 > L$ ). We finally apply a  $1 \times 1$  convolution layer to reduce the channel dimension. The resulting output is a  $L \times 1 \times 2$  tensor, containing the TMRCA estimates and the unscaled estimated probabilities (logits) of observing a recombination breakpoint for each of the  $L$  sites, i.e., for every genomic site the network predicts the TMRCA and whether that site is a recombination breakpoint, resulting in  $2 \times L$  predictions. When deploying CoalNN for inference, we apply an additional scaling layer on both estimates: predicted TMRCA that exceed the maximum coalescence time observed while training are clipped and a softmax function is applied to the logits to turn them into estimated probabilities of recombination. Clipping is not applied to the predictions of ASMC, since the HMM discretizes time, producing a bounded output.

## Additional simulation experiments

We performed experiments where we assumed recombination rates to be unknown a priori. We trained CoalNN using  $N_e = 10K$  and a constant recombination rate of  $\rho = 1\text{cM/Mb}$ , while other evolutionary parameters were set as described in the Methods section. We then simulated distinct data sets using recombination rates from Chromosome 2, and aimed to estimate the unknown underlying simulated recombination rate between each pair of neighboring sites,  $\hat{\rho}_i$ . At every position  $i$  along the genome and for every pair of haplotypes  $j$ , CoalNN outputs an estimate of TMRCA  $\hat{t}_{i,j}$  and the estimated probability of recombination  $\hat{p}_{i,j}$ . We estimated recombination rates using  $\hat{\rho}_i = N^{-1} \sum_{j=0}^N \hat{p}_{i,j} / \hat{t}_{i,j}$ , which accounts for the fact that the probability of observing a recombination event depends approximately linearly on  $\rho_i t_{i,j}$ , where  $\rho_i$  is the true recombination rate at position  $i$  and  $t_{i,j}$  is the true TMRCA for the pair. We observed these estimates to be highly correlated with the true underlying genetic distance between consecutive polymorphisms ( $r = 0.255$ , SE= 0.002 across 5 distinct random seeds).

## Supplementary Figures

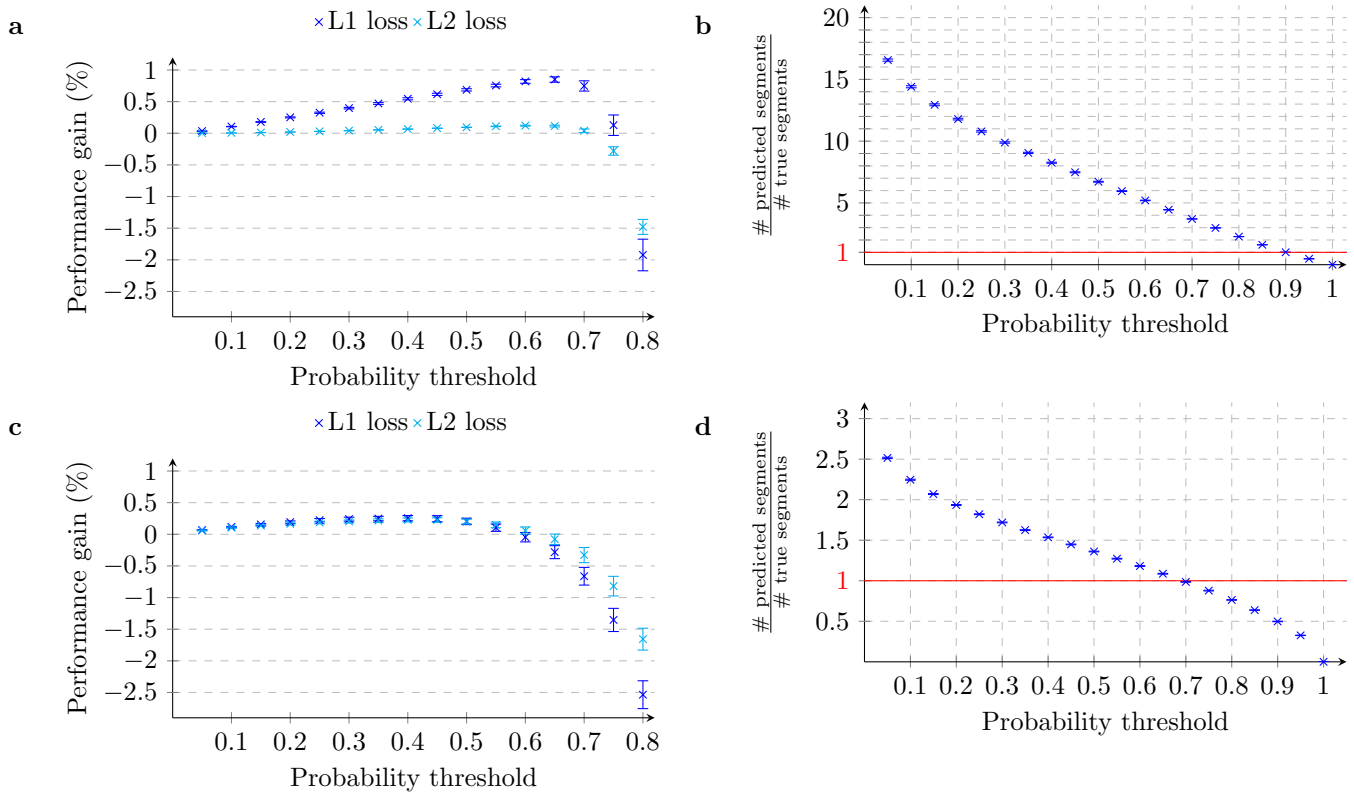

**Supplementary Fig. 1. Forming piecewise constant TMRCA estimates.** **a, c.** In **b** (resp in **d**) we report the average percent improvement of piecewise constant TMRCA prediction over the raw output of CoalNN using L1 (mean absolute error: MAE) and L2 (root mean squared error: RMSE) losses for sequencing (resp. array) data, for increasing threshold values. **b, d.** In **c** (resp. in **e**) we report the average ratio between the total number of predicted segments and the total number of true segments for increasing threshold values, where a segment refers to a piece of the genome with constant TMRCA value. Error bars represent standard errors across 10 simulations.

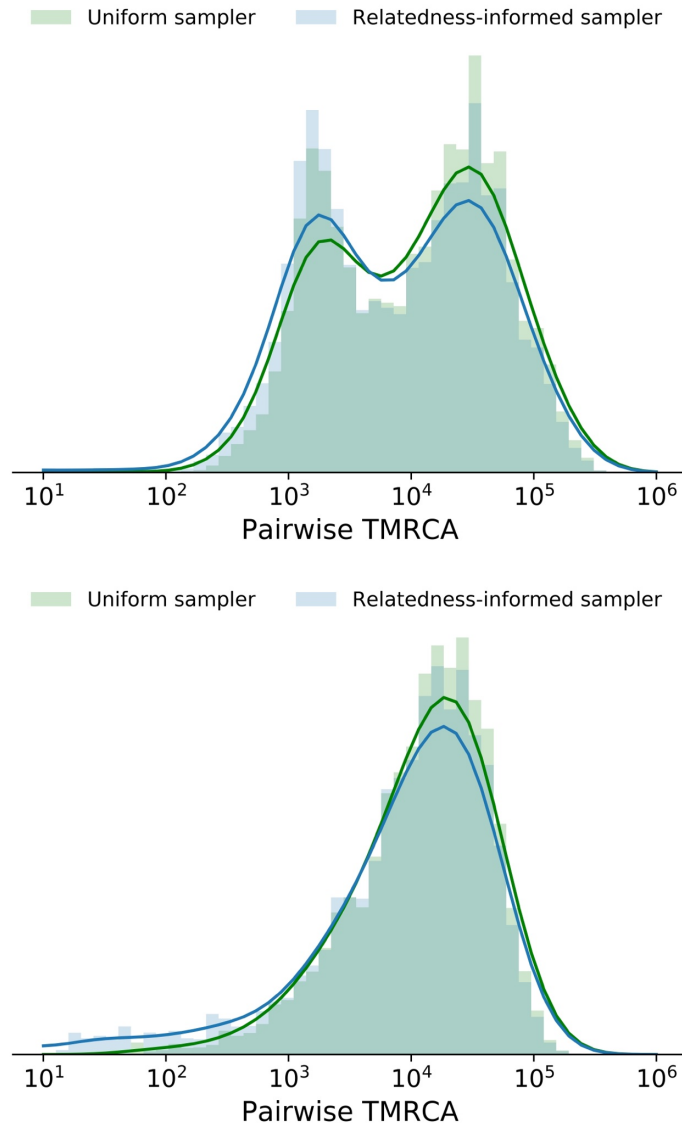

**Supplementary Fig. 2. Pairwise TMRCA sampling distribution.** Distributions of pairwise TMRCA in generations (empirical histograms) obtained from a uniform sampler (in green) and a relatedness-informed sampler (in blue) from a single simulation under a European demographic model (top) and a constant population size  $N_e = 10,000$  (below). Solid curves show kernel density estimations using Gaussian kernels (bandwidth = 0.25).

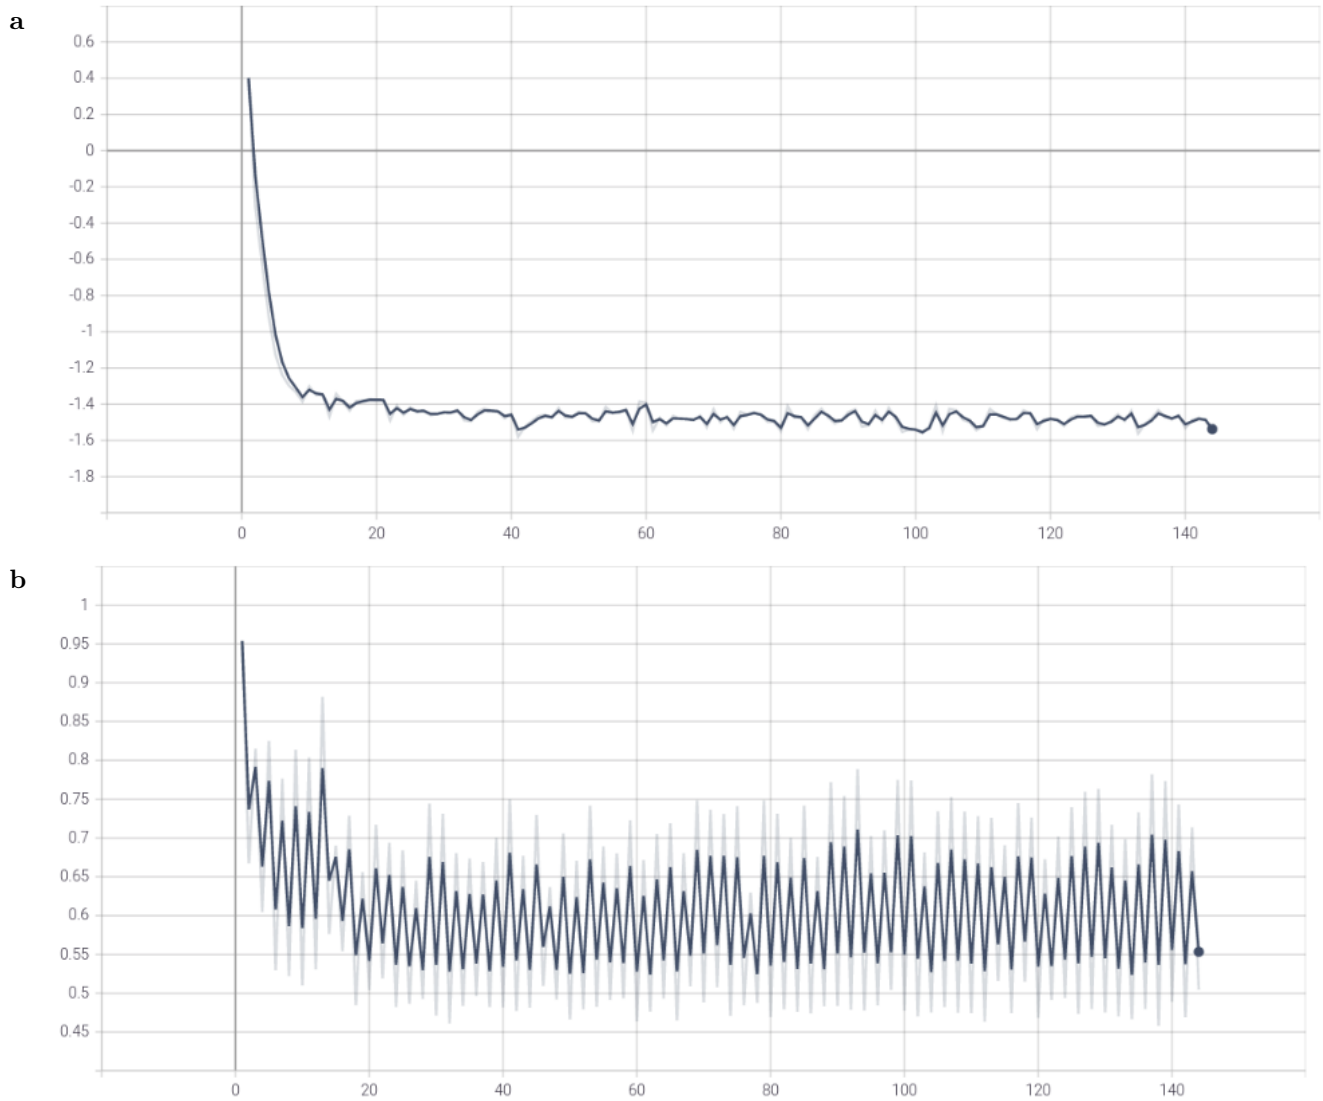

**Supplementary Fig. 3. CoalNN training and validation loss.** Training (a) and validation (b) loss obtained during the training of CoalNN on a constant population size demography with  $N_e = 10,000$ . Y axes represent loss values, X axes represent number of training epochs.

**a**

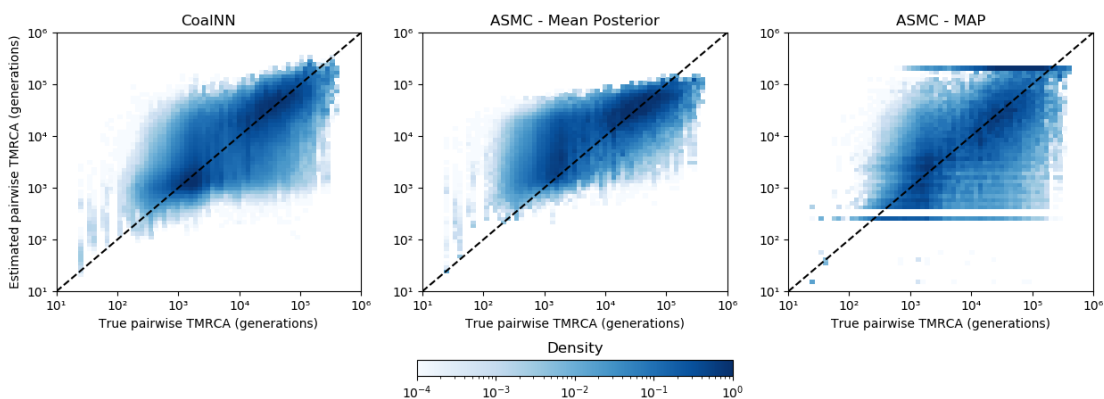

**b**

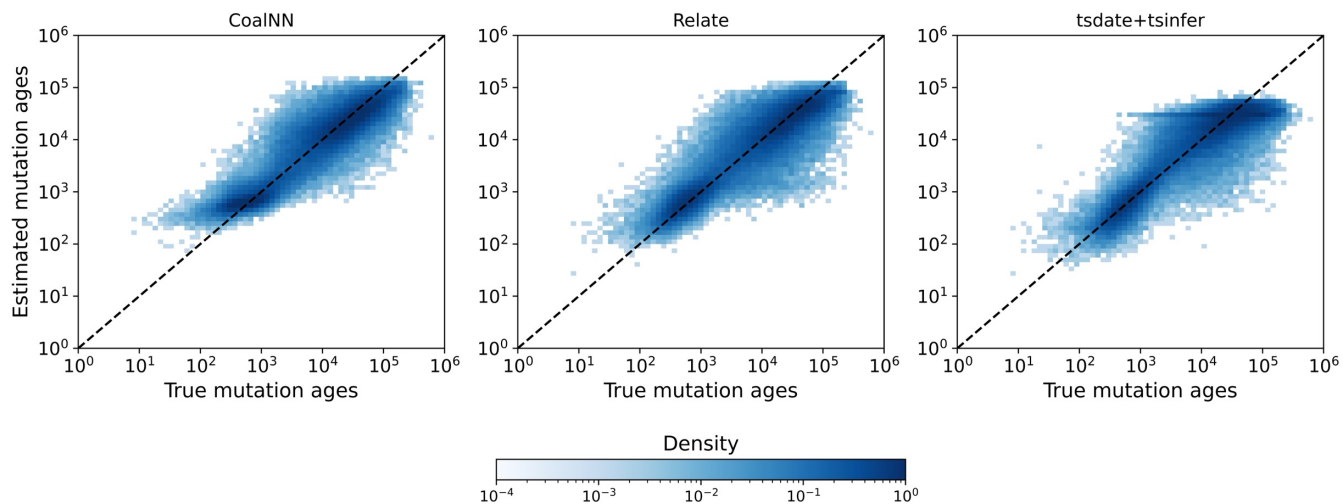

**Supplementary Fig. 4. Pairwise TMRCA and allele age prediction under a European demographic model.** **a.** True pairwise TMRCA (x axis) versus those estimated by CoalINN and ASMC (y axis) on array data for one simulation. **b.** True non-singleton variant ages (x axis) versus those estimated by CoalINN, Relate and tsinfer+tsdate (y axis) on sequencing data for one simulation.

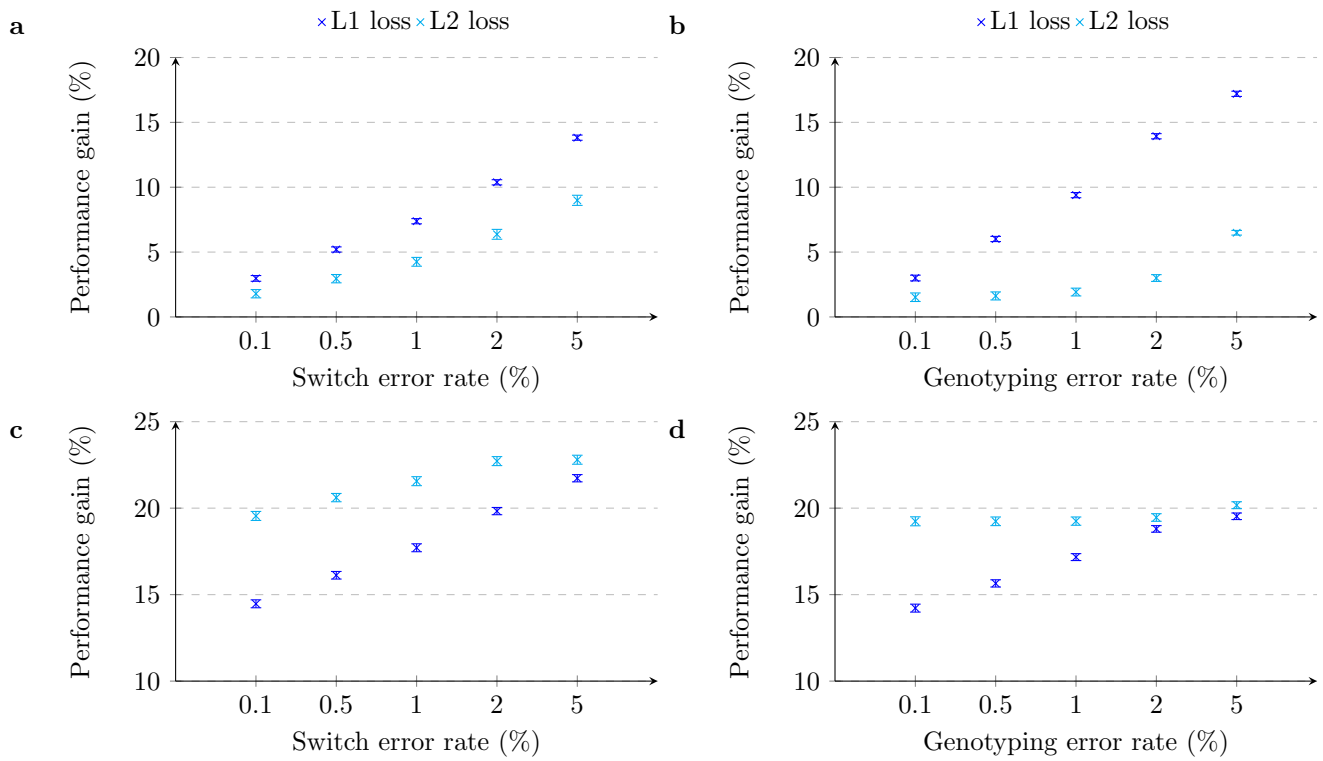

**Supplementary Fig. 5. Robustness to genotyping and phasing errors.** Average percent performance improvement for TMRCA prediction in sequencing data of CoalNN over ASMC mean posterior in **a**, **b** and over ASMC MAP in **c**, **d** for the L1 (mean absolute error: MAE) and L2 (root mean squared error: RMSE) losses for increasing switch and genotyping error rates respectively. Error bars represent standard errors across 20 simulations.



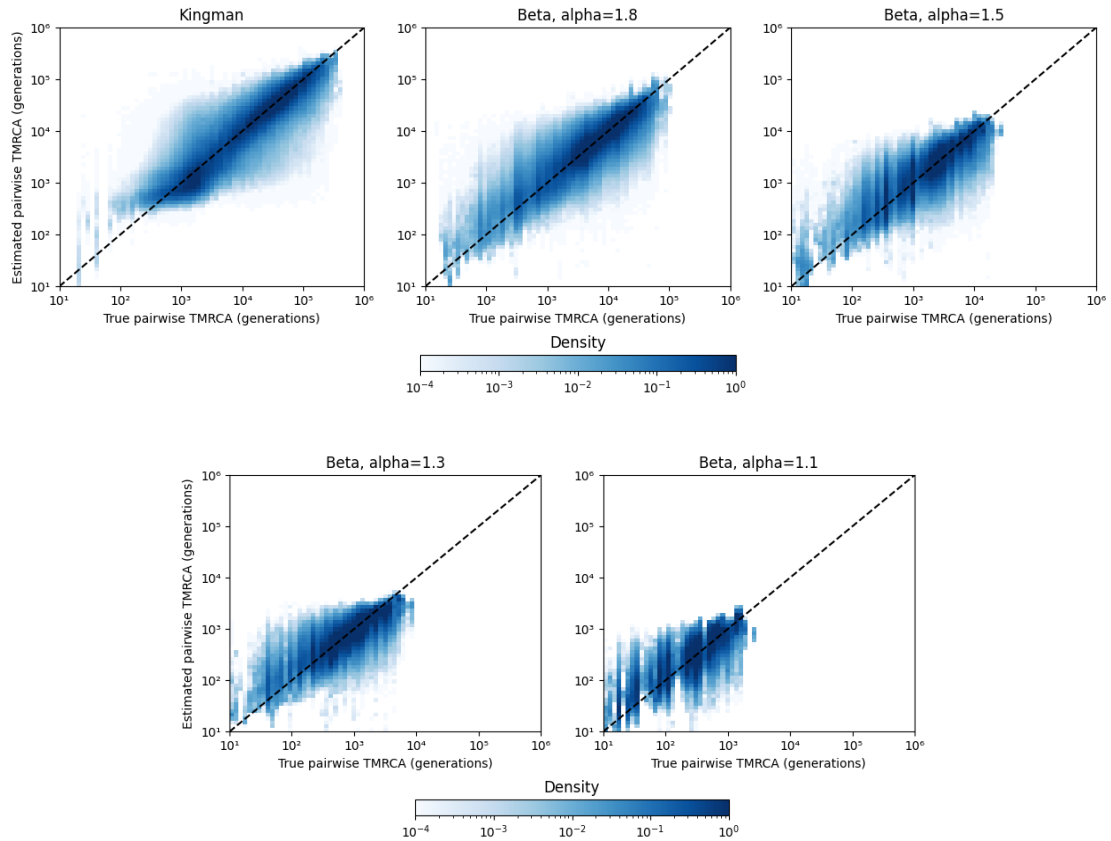

**Supplementary Fig. 6. Scatter plots of true vs CoalNN-predicted TMRCA.** The evolutionary model and parameters used are: Kingman coalescent with  $N_e = 10,000$  (top left), Beta coalescent with  $\alpha = 1.8$  and  $N_e = 20,000$  (top middle), Beta coalescent with  $N_e = 50,000$  and  $\alpha = 1.5$  (top right),  $\alpha = 1.3$  (bottom left) and  $\alpha = 1.1$  (bottom right).

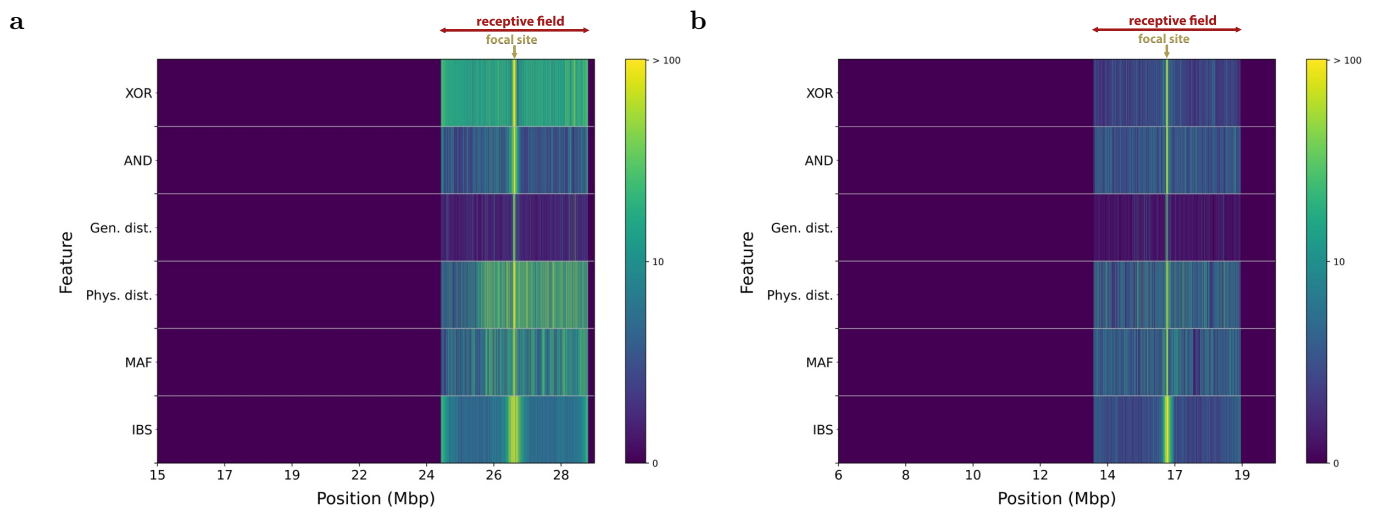

**Supplementary Fig. 7. Feature importance analysis.** We obtained saliency maps (Simonyan et al., 2014; Zeiler and Fergus, 2014) at a genomic locus with recent coalescence time in **a** (TMRCA = 37 generations) and with deep coalescence time in **b** (TMRCA = 237,079 generations). Values are shown in log scale and correspond to  $|\text{input} \times \text{gradient}|$  (Shrikumar et al., 2016), where input refers to the batch normalized input (see Methods). Higher values (closer to yellow) indicate input positions with large effects on the TMRCA estimate. Positions with value 0 have no impact on the prediction and are typically outside of the receptive field.

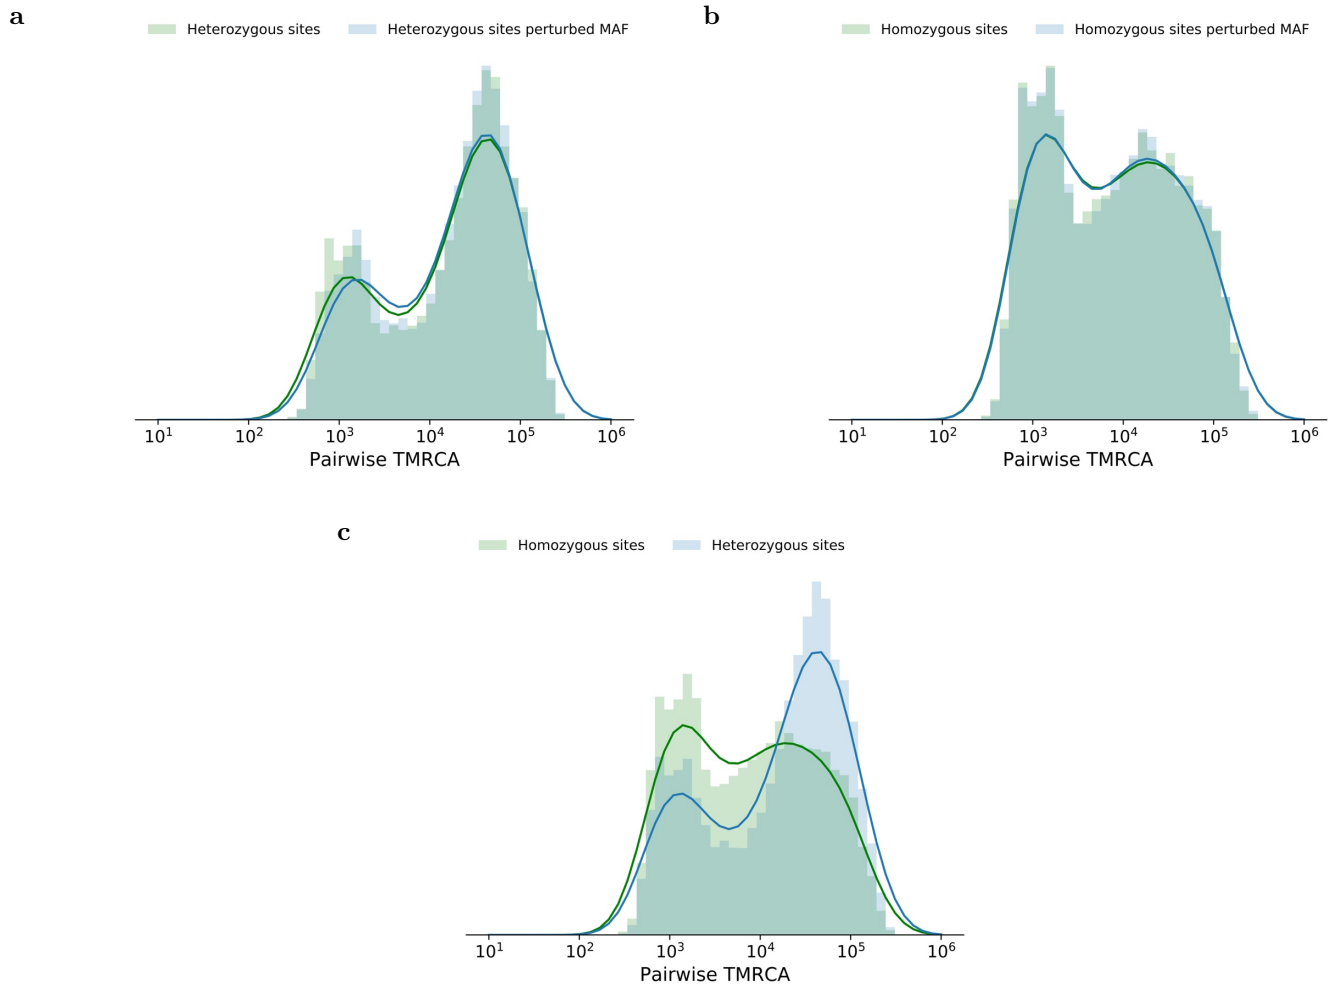

**Supplementary Fig. 8. Predicted TMRCA distributions under MAF perturbation.** Empirical histograms showing the predicted TMRCA at heterozygous (in **a**) or at homozygous derived (in **b**) genomic sites before and after the MAF perturbation, for one simulation. Increasing the input MAF value by 5% at sites for which individuals are heterozygous resulted in an average increase in predicted TMRCA of 181.5 (SE=3.7) generations. Decreasing the MAF at homozygous sites resulted in an average decrease of predicted TMRCA of 27.6 (SE=1.7) generations. **c** shows TMRCA values predicted by CoalNN at heterozygous and homozygous derived sites, without any MAF perturbation. Solid curves show kernel density estimations using Gaussian kernels (bandwidth = 0.25).

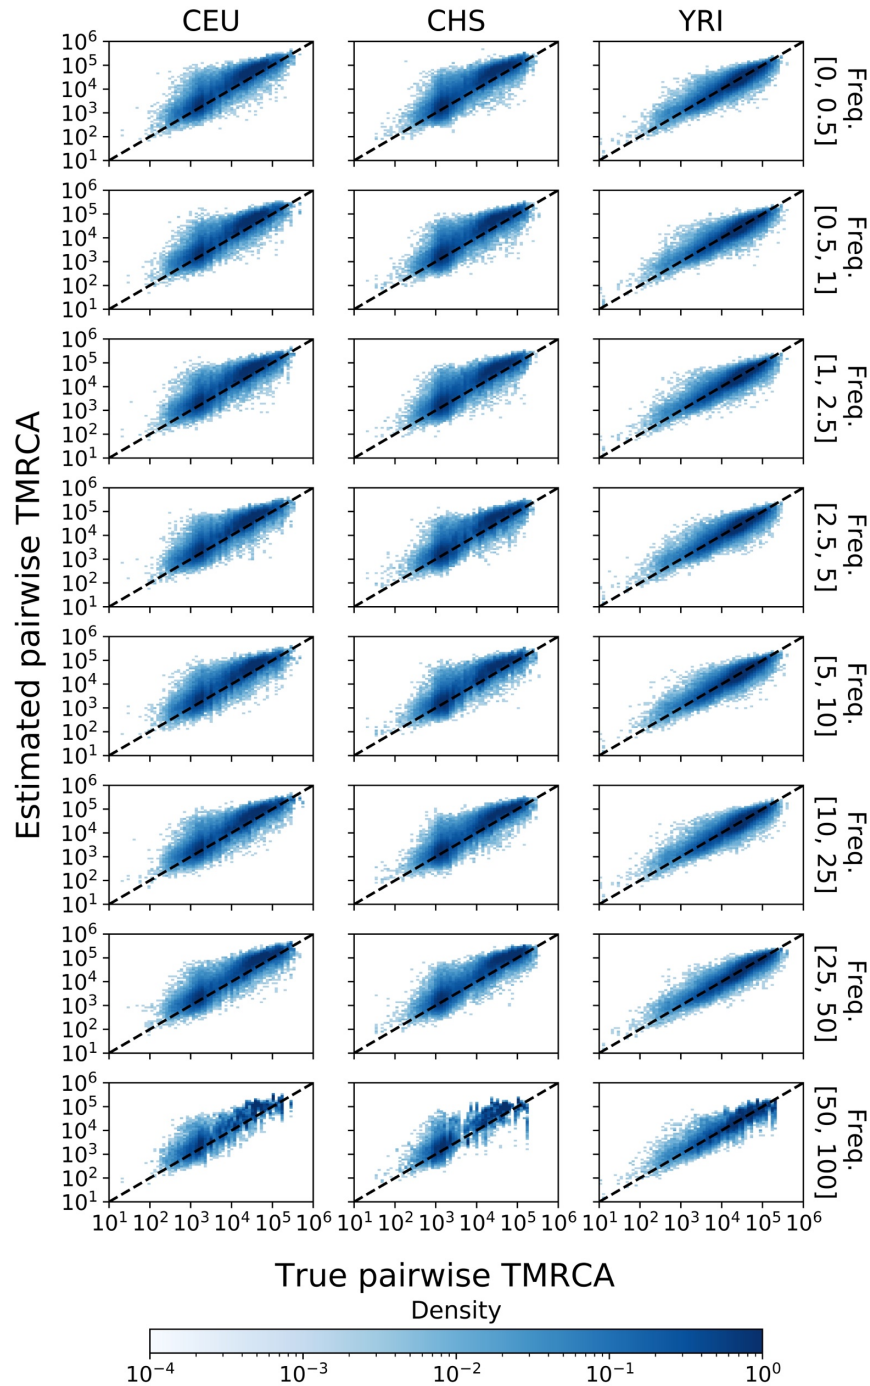

**Supplementary Fig. 9. Performance of CoalNN trained on a constant demographic prior.** We visualise true pairwise TMRCA (x axis) versus those estimated by CoalNN trained on a constant demographic population size ( $N_e = 20,000$ , y axis), stratified by derived allele frequency, on simulations using recombination rates and demographic history from CEU, CHS and YRI (Terhorst et al., 2017; Spence and Song, 2019) (sequencing data for 150 diploid individuals and a 30 Mbp region from chromosome 2).

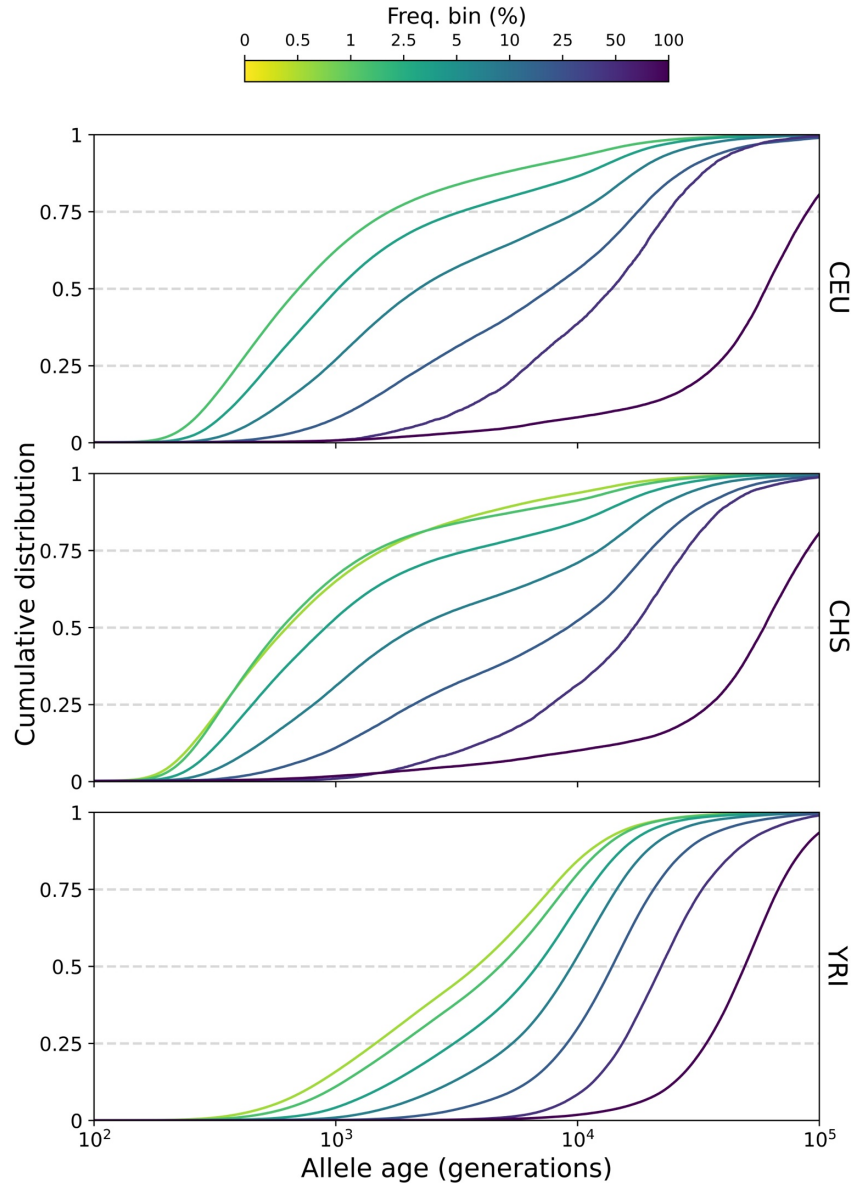

**Supplementary Fig. 10. Age distribution of variants dated by CoalNN trained on a constant demographic prior.** Cumulative age distribution of genome-wide variants dated by CoalNN trained on a constant demographic population size ( $N_e = 20,000$ ), stratified by derived allele frequency as observed within a given population group. See Supplementary Table 9 for additional information.

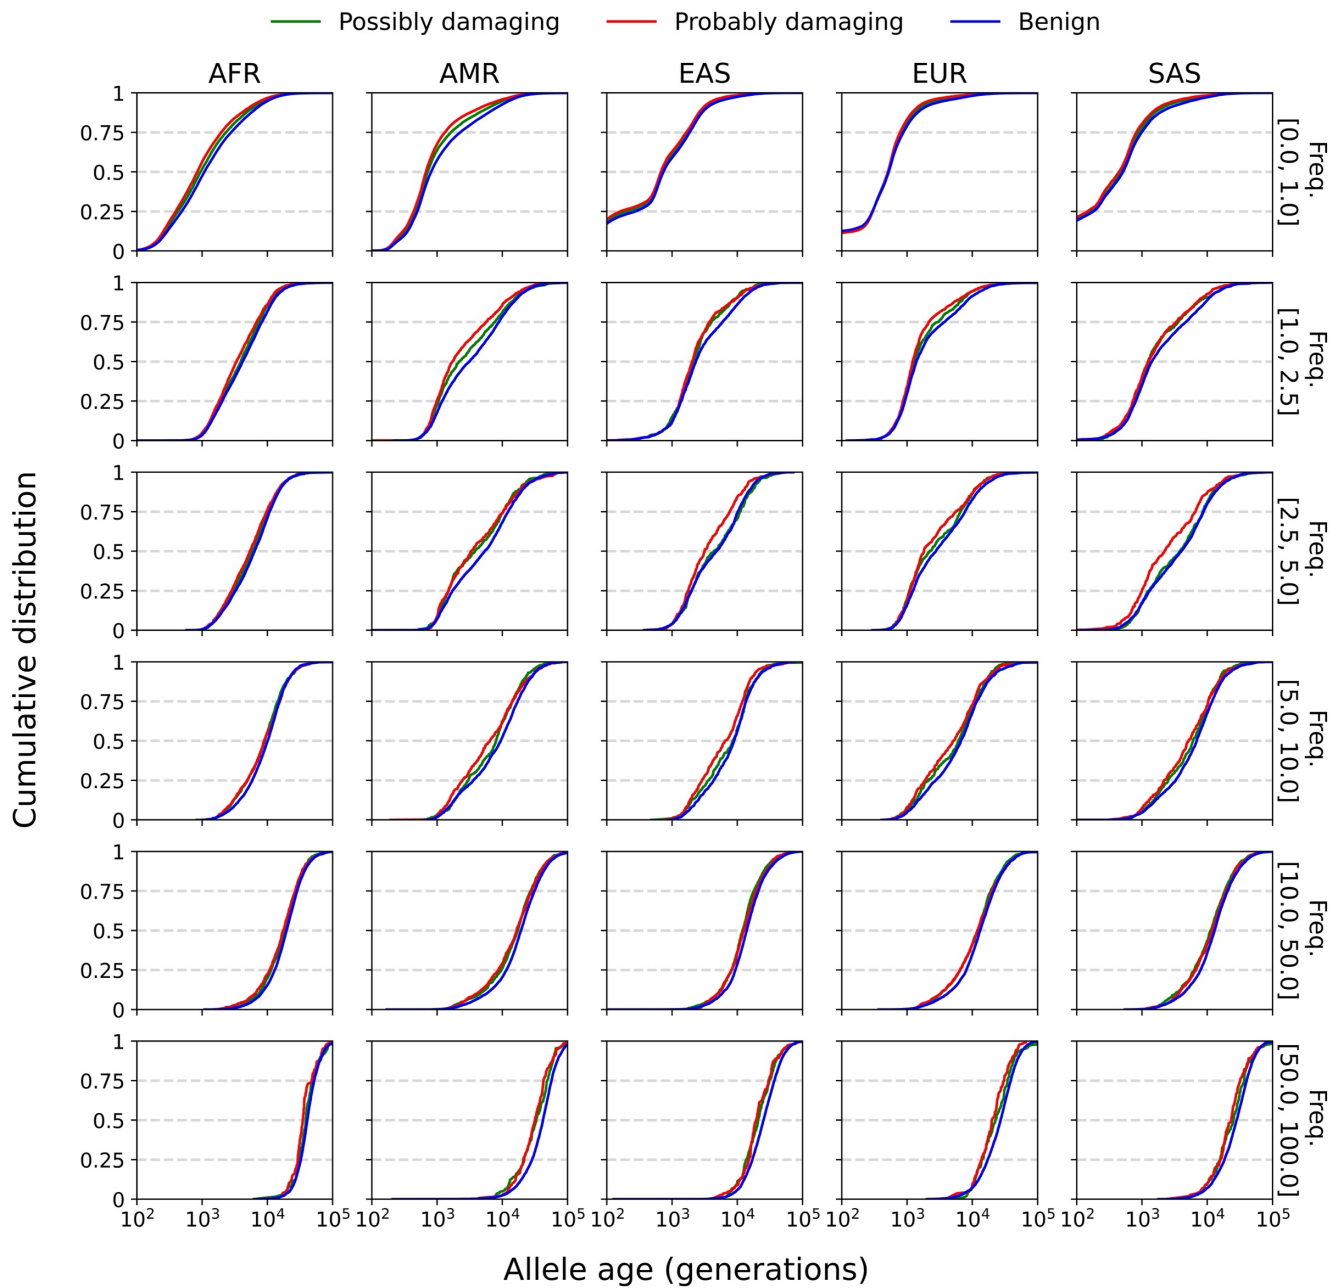

**Supplementary Fig. 11. Allele age distribution of variants annotated by PolyPhen-2.** Cumulative distribution function of allele ages inferred by CoalNN for different variant pathogenicity levels predicted using PolyPhen-2 (“possibly damaging”, “probably damaging” or “benign”) (Adzhubei et al., 2010), stratified by derived allele frequency within each population group.

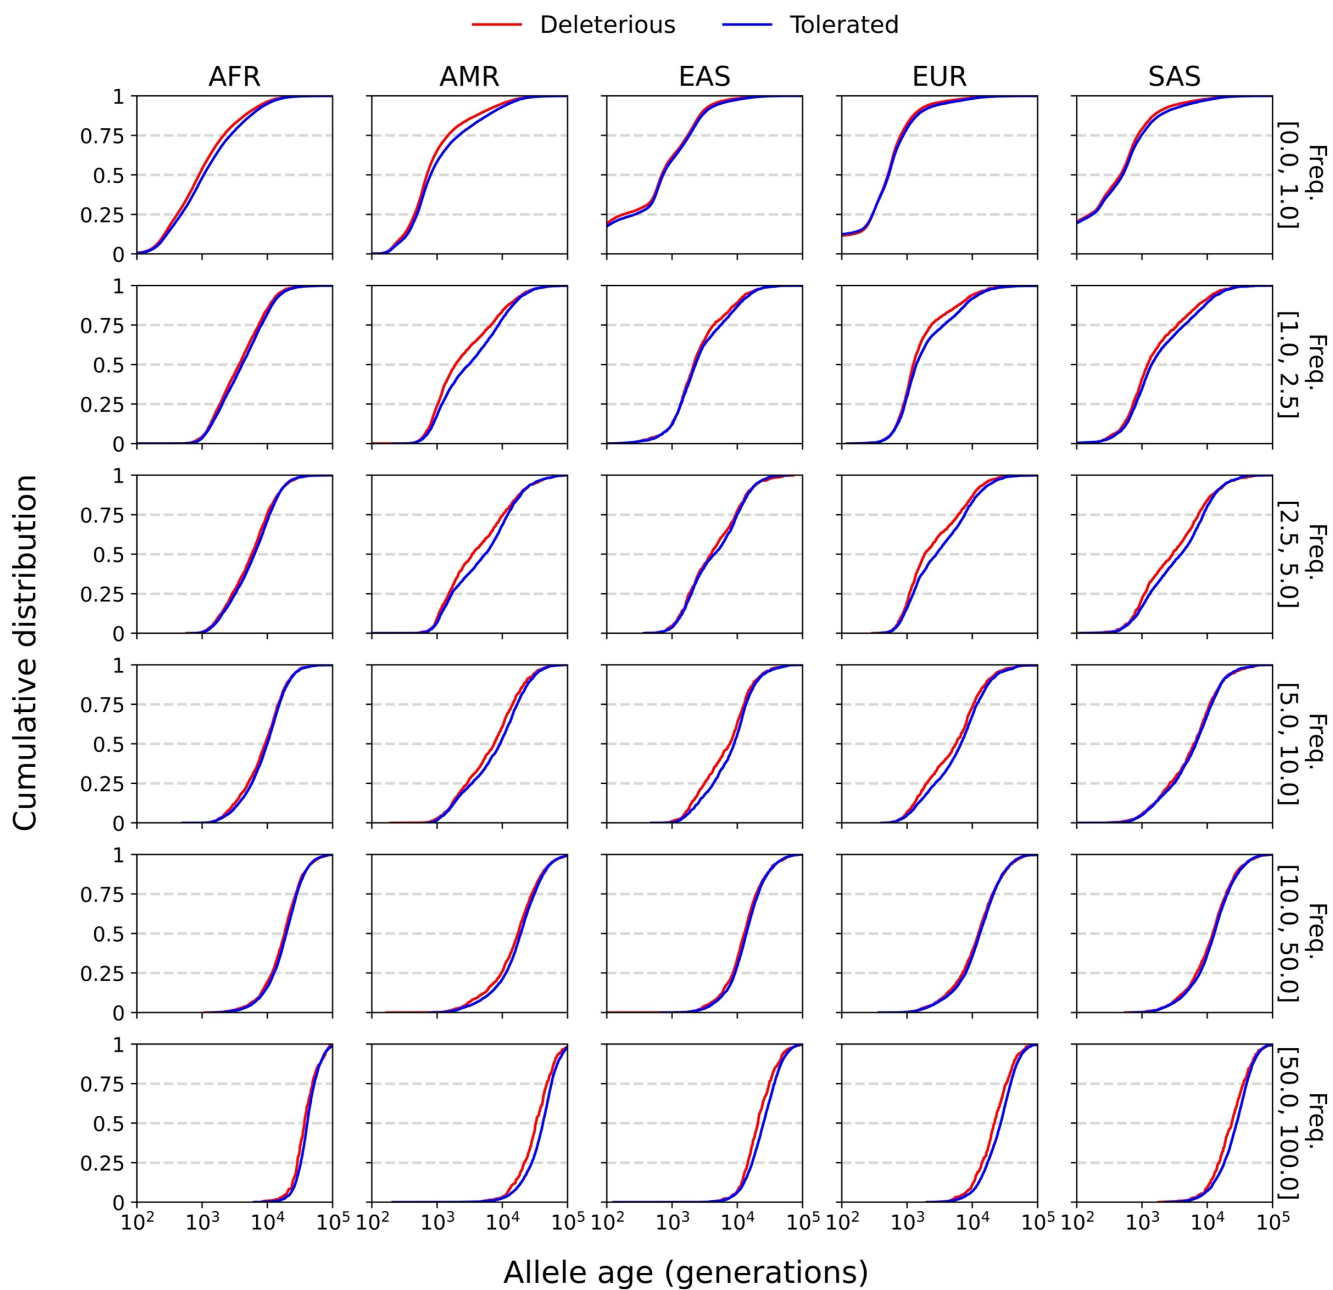

**Supplementary Fig. 12. Allele age distribution of variants annotated by SIFT.** Cumulative distribution function of allele ages inferred by CoalNN for different variant pathogenicity levels predicted using SIFT (“deleterious” or “tolerated”) (Sim et al., 2012), stratified by derived allele frequency within each population group.

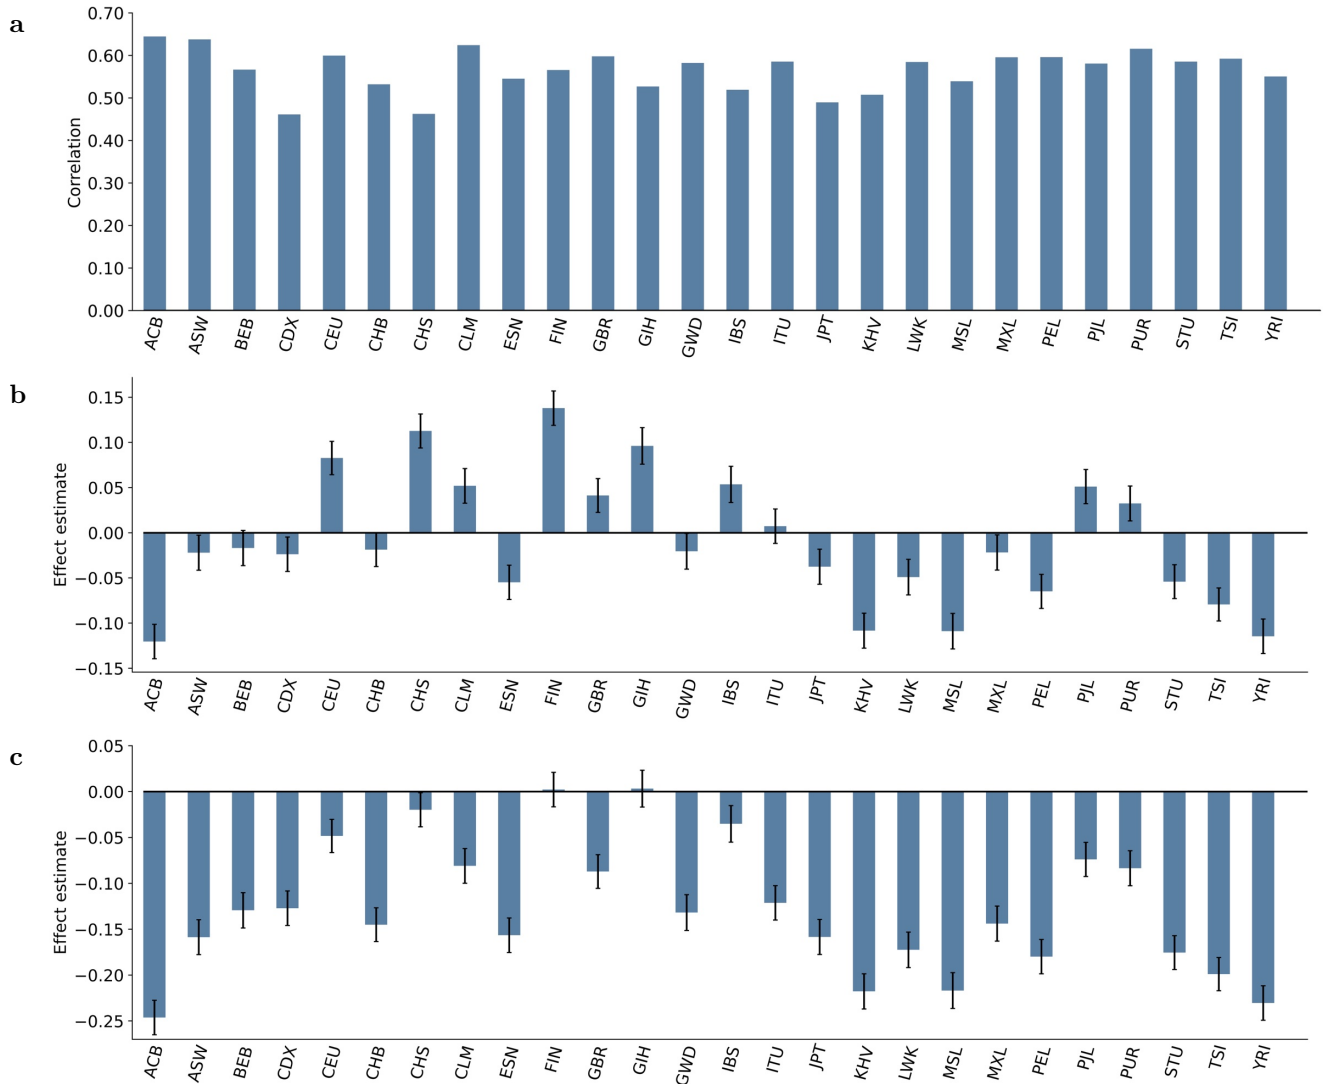

**Supplementary Fig. 13. S-LDSC analyses including both ARGweaver and CoalNN. a.** Correlations between each of the 26 population-specific MAF-adjusted CoalNN annotations and the MAF-adjusted ARGweaver annotation. **b, c.**  $\tau^*$  estimates (meta-analysed across 63 independent diseases and complex traits) of CoalNN MAF-adjusted allele age annotation on each of the 26 populations in marginal independent S-LDSC analyses conditioned on the full 97 Baseline-LD model in **b** and conditioned on 96 Baseline-LD annotations (all but ARGweaver) in **c**.



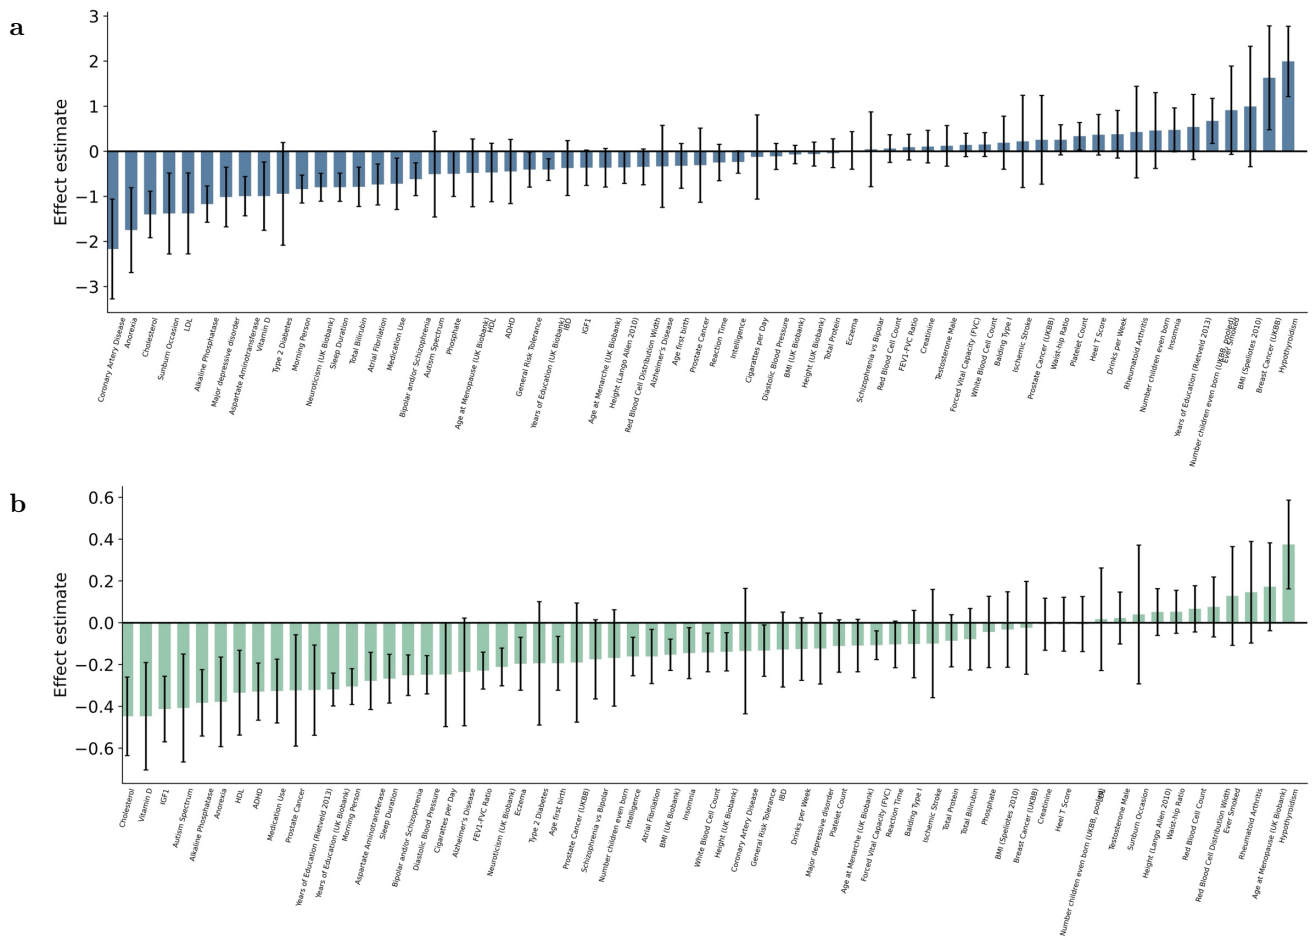

**Supplementary Fig. 14. CoalNN heritability effect for individual traits.** S-LDSC  $\tau^*$  value of the CoalNN MAF-adjusted annotation (averaged across 26 populations) in **a** and of the ARGweaver MAF-adjusted annotation in **b** for 63 independent diseases and traits (listed in Supplementary Table 2), conditioned on 96 baselineLD annotations. Error bars represent s.e. of the  $\tau^*$  estimate.

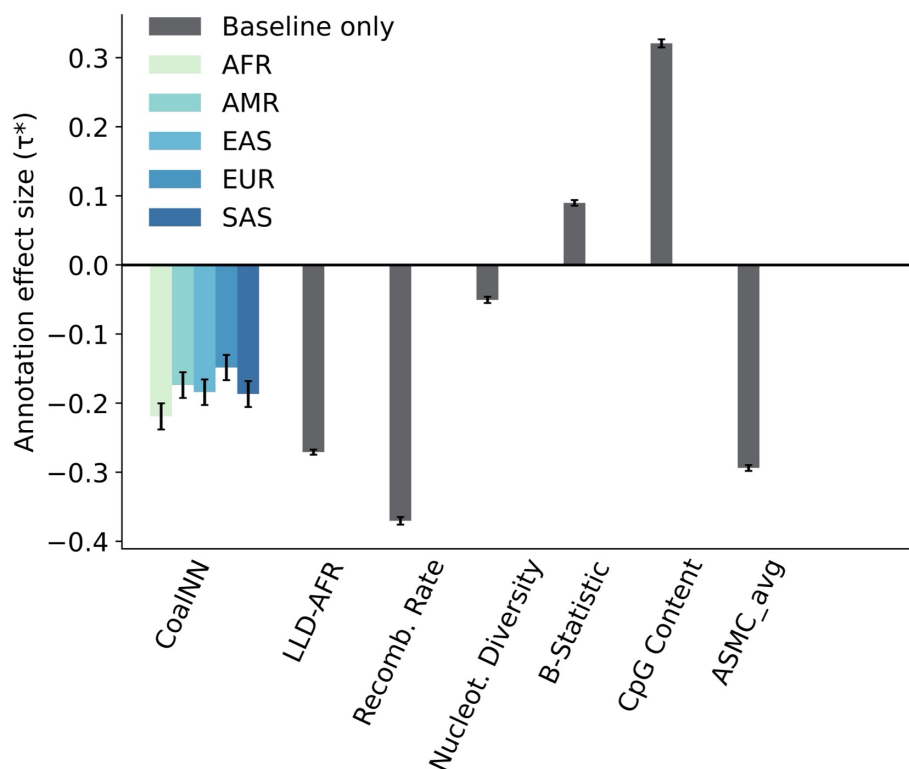

**Supplementary Fig. 15. S-LDSC analysis of CoalNN annotations built using population groups.** S-LDSC  $\tau^*$  estimates of CoalNN annotations built using each population group (AFR, AMR, EAS, EUR and SAS) in independent S-LDSC analyses conditioned on 96 baselineLD annotations (all but ARGweaver), meta-analyzed across 63 independent disease and traits (listed in Supplementary Table 2). For comparison, we also report  $\tau^*$  effects of other Baseline-LD evolutionary annotations (level of LD measured in African populations, recombination rate, nucleotide diversity, McVicker  $B$ -statistic and average pairwise TMRCA  $ASMC_{avg}$ ) before the introduction of the CoalNN annotations (in dark grey). Adding the CoalNN annotations did not result in a significant change of  $\tau^*$  for other annotations. Error bars represent standard errors of the meta-analyzed  $\tau^*$  estimates. Numerical results are reported in Supplementary Table 12.

## Supplementary Tables

| Population Code | Description                                                       | Group Code |
|-----------------|-------------------------------------------------------------------|------------|
| CHB             | Han Chinese in Beijing, China                                     | EAS        |
| JPT             | Japanese in Tokyo, Japan                                          | EAS        |
| CHS             | Han Chinese South                                                 | EAS        |
| CDX             | Chinese Dai in Xishuangbanna, China                               | EAS        |
| KHV             | Kinh in Ho Chi Minh City, Vietnam                                 | EAS        |
| CEU             | Utah residents (CEPH) with Northern and Western European ancestry | EUR        |
| TSI             | Toscani in Italy                                                  | EUR        |
| FIN             | Finnish in Finland                                                | EUR        |
| GBR             | British in England and Scotland                                   | EUR        |
| IBS             | Iberian populations in Spain                                      | EUR        |
| YRI             | Yoruba in Ibadan, Nigeria                                         | AFR        |
| LWK             | Luhya in Webuye, Kenya                                            | AFR        |
| MAG             | Gambian in Western Division, The Gambia - Mandinka                | AFR        |
| MSL             | Mende in Sierra Leone                                             | AFR        |
| ESN             | Esan in Nigeria                                                   | AFR        |
| ASW             | African Ancestry in Southwest US                                  | AFR        |
| ACB             | African Caribbean in Barbados                                     | AFR        |
| MXL             | Mexican Ancestry in Los Angeles, California, US                   | AMR        |
| PUR             | Puerto Rican in Puerto Rico                                       | AMR        |
| CLM             | Colombian in Medellin, Colombia                                   | AMR        |
| PEL             | Peruvian in Lima, Peru                                            | AMR        |
| GIH             | Gujarati Indians in Houston, Texas, US                            | SAS        |
| PJL             | Punjabi in Lahore, Pakistan                                       | SAS        |
| BEB             | Bengali in Bangladesh                                             | SAS        |
| STU             | Sri Lankan Tamil in the UK                                        | SAS        |
| ITU             | Indian Telugu in the UK                                           | SAS        |

**Supplementary Table 1. 1kG populations.** Population labels and supergroup assignments. (Retrieved from [www.internationalgenome.org](http://www.internationalgenome.org) (Byrska-Bishop et al., 2022))

| Phenotype                                | Reference                             | $h_g^2$ | Z-score | N         |
|------------------------------------------|---------------------------------------|---------|---------|-----------|
| BMI (UK Biobank)                         | UK Biobank                            | 0.278   | 41.478  | 457,824   |
| Years of Education (UK Biobank)          | UK Biobank                            | 0.136   | 35.789  | 454,813   |
| Forced Vital Capacity (FVC)              | UK Biobank                            | 0.234   | 32.444  | 371,949   |
| Intelligence                             | Savage et al. 2018 Nat Genet          | 0.186   | 29.047  | 264,193   |
| Neuroticism (UK Biobank)                 | UK Biobank                            | 0.114   | 28.475  | 372,066   |
| Diastolic Blood Pressure                 | UK Biobank                            | 0.233   | 27.738  | 422,771   |
| White Blood Cell Count                   | UK Biobank                            | 0.227   | 27.386  | 444,502   |
| Height (UK Biobank)                      | UK Biobank                            | 0.674   | 25.824  | 458,303   |
| Morning Person                           | UK Biobank                            | 0.106   | 24.674  | 410,520   |
| Age at Menarche (UK Biobank)             | UK Biobank                            | 0.253   | 24.563  | 242,278   |
| TotalProtein                             | UK Biobank                            | 0.181   | 24.147  | 397,652   |
| Waist-hip Ratio                          | UK Biobank                            | 0.171   | 23.681  | 458,417   |
| FEV1-FVC Ratio                           | UK Biobank                            | 0.276   | 23.615  | 371,949   |
| Reaction Time                            | Davies et al. 2018 Nat Comm           | 0.081   | 22.556  | 300,486   |
| Creatinine                               | UK Biobank                            | 0.221   | 21.911  | 434,158   |
| Red Blood Cell Count                     | UK Biobank                            | 0.261   | 21.775  | 445,174   |
| Bipolar and/or Schizophrenia             | Ruderfer et al. 2018 Cell             | 0.334   | 21.656  | 107,620   |
| Platelet Count                           | UK Biobank                            | 0.351   | 21.242  | 444,382   |
| Heel T Score                             | UK Biobank                            | 0.355   | 20.514  | 445,921   |
| Sleep Duration                           | Dashti et al. 2019 Nat Comm           | 0.071   | 19.667  | 446,118   |
| IGF1                                     | UK Biobank                            | 0.288   | 18.682  | 432,292   |
| General Risk Tolerance                   | Karlsson Linner et al. 2019 Nat Genet | 0.051   | 18.357  | 466,571   |
| AspartateAminotransferase                | UK Biobank                            | 0.114   | 18.306  | 430,982   |
| Red Blood Cell Distribution Width        | UK Biobank                            | 0.217   | 17.803  | 442,700   |
| Insomnia                                 | Jansen et al. 2019 Nat Genet          | 0.044   | 17.600  | 383,948   |
| Height (Lango Allen 2010)                | Lango Allen et al. 2010 Nature        | 0.222   | 17.512  | 131,547   |
| Number children even born (UKBB, pooled) | UK Biobank                            | 0.039   | 16.783  | 456,500   |
| Atrial Fibrillation                      | Nielsen et al. 2018 AJHG              | 0.022   | 16.769  | 1,030,836 |
| TestosteroneMale                         | UK Biobank                            | 0.184   | 16.577  | 196,813   |
| BMI (Speliotes 2010)                     | Speliotes et al., 2010 Nat Genet      | 0.146   | 16.233  | 122,033   |
| Hypothyroidism                           | UK Biobank                            | 0.055   | 15.167  | 459,324   |
| Age first birth                          | Barban et al., 2016 Nat Genet         | 0.062   | 15.073  | 222,037   |
| Balding Type I                           | UK Biobank                            | 0.223   | 14.697  | 208,336   |
| AlkalinePhosphatase                      | UK Biobank                            | 0.235   | 14.675  | 433,862   |
| Eczema                                   | UK Biobank                            | 0.085   | 14.603  | 458,699   |
| Drinks per Week                          | Liu et al. 2019 Nat Genet             | 0.046   | 14.438  | 527,299   |
| Phosphate                                | UK Biobank                            | 0.129   | 14.198  | 397,561   |
| Medication Use                           | Wu et al. 2019 Nat Comm               | 0.157   | 14.036  | 78,808    |
| IBD                                      | de Lange et al. 2017 Nat Genet        | 0.321   | 13.193  | 59,957    |
| VitaminD                                 | UK Biobank                            | 0.086   | 12.464  | 415,700   |
| Major depressive disorder                | Wray et al. 2018 Nat Genet            | 0.073   | 12.339  | 170,229   |
| Cholesterol                              | UK Biobank                            | 0.131   | 11.670  | 435,137   |
| ADHD                                     | Demontis et al. 2019 Nat Genet        | 0.248   | 11.634  | 55,374    |
| TotalBilirubin                           | UK Biobank                            | 0.084   | 11.066  | 429,423   |
| Age at Menopause (UK Biobank)            | UK Biobank                            | 0.109   | 11.040  | 143,025   |
| Sunburn Occasion                         | UK Biobank                            | 0.073   | 9.618   | 344,229   |
| Number children even born                | Barban et al., 2016 Nat Genet         | 0.023   | 9.542   | 318,863   |
| Schizophrenia vs Bipolar                 | Ruderfer et al. 2018 Cell             | 0.265   | 9.495   | 38,855    |
| Years of Education (Rietveld 2013)       | Rietveld et al., 2013 Science         | 0.077   | 9.354   | 126,559   |
| HDL                                      | Teslovich et al., 2010 Nature         | 0.125   | 9.259   | 97,749    |
| LDL                                      | Teslovich et al., 2010 Nature         | 0.103   | 8.821   | 93,354    |
| Cigarettes per Day                       | Liu et al. 2019 Nat Genet             | 0.058   | 8.657   | 257,073   |
| Ischemic Stroke                          | Malik et al. 2018 Nat Genet           | 0.017   | 8.350   | 440,328   |
| Anorexia                                 | Boraska et al., 2014 Mol Psych        | 0.236   | 8.274   | 32,143    |
| Alzheimer's Disease                      | Jansen et al. 2019 Nat Genet          | 0.014   | 7.833   | 433,886   |
| Rheumatoid Arthritis                     | Okada et al., 2014 Nature             | 0.187   | 7.510   | 37,681    |
| Ever Smoked                              | TAG Consortium, 2010 Nat Genet        | 0.085   | 7.482   | 74,035    |
| Prostate Cancer                          | Schumacher et al. 2018 Nat Genet      | 0.131   | 7.016   | 72,729    |
| Prostate Cancer (UKBB)                   | UK Biobank                            | 0.017   | 7.000   | 459,324   |
| Breast Cancer (UKBB)                     | UK Biobank                            | 0.018   | 6.846   | 459,324   |
| Type 2 Diabetes                          | Morris et al., 2012 Nat Genet         | 0.095   | 6.463   | 60,786    |
| Autism Spectrum                          | PGC Cross-Disorder Group, 2013 Lancet | 0.622   | 6.191   | 10,263    |
| Coronary Artery Disease                  | Schunkert et al., 2011 Nat Genet      | 0.075   | 6.016   | 77,210    |

**Supplementary Table 2. Traits used in S-LDSC analyses.** We report phenotype name, study reference, SNP heritability  $h_g^2$ , heritability Z-score, and number of samples  $N$  for the 63 independent diseases and complex traits (Gazal et al., 2021) used in S-LDSC analyses.

|             |      | CoalNN      | ASMC mean posterior |
|-------------|------|-------------|---------------------|
| 1st decile  | MAE  | 424 (2)     | 857 (6)             |
|             | RMSE | 1151 (8)    | 2392 (17)           |
| 2nd decile  | MAE  | 745 (7)     | 1164 (15)           |
|             | RMSE | 1673 (20)   | 3200 (35)           |
| 3rd decile  | MAE  | 1233 (19)   | 1683 (36)           |
|             | RMSE | 2382 (34)   | 4070 (54)           |
| 4th decile  | MAE  | 2465 (53)   | 3287 (83)           |
|             | RMSE | 4193 (82)   | 6245 (106)          |
| 5th decile  | MAE  | 4365 (67)   | 5696 (104)          |
|             | RMSE | 6742 (99)   | 9163 (114)          |
| 6th decile  | MAE  | 5927 (82)   | 7043 (96)           |
|             | RMSE | 8743 (122)  | 10689 (122)         |
| 7th decile  | MAE  | 7715 (72)   | 8060 (64)           |
|             | RMSE | 10970 (101) | 11859 (71)          |
| 8th decile  | MAE  | 10741 (105) | 9984 (92)           |
|             | RMSE | 14286 (118) | 13941 (104)         |
| 9th decile  | MAE  | 15944 (150) | 14452 (171)         |
|             | RMSE | 20253 (179) | 19063 (196)         |
| 10th decile | MAE  | 34508 (236) | 33869 (284)         |
|             | RMSE | 47456 (341) | 47604 (422)         |

**Supplementary Table 3. Accuracy of pairwise TMRCA prediction by decile of TMRCA distribution.**

We report the average performance of CoalNN and ASMC mean posterior in generations for the mean absolute error (MAE) and the root mean squared error (RMSE) for deciles of the true TMRCA distribution across 10 simulations of sequencing data. Numbers in round brackets represent standard errors.

|                     |     | ASMC mean posterior | ASMC MAP    | Runtime (mins) |
|---------------------|-----|---------------------|-------------|----------------|
| Discretization bins | 100 | MAE                 | 8633 (34)   | 9676 (50)      |
|                     |     | RMSE                | 18189 (158) | 21410 (169)    |
|                     | 200 | MAE                 | 8594 (30)   | 9758 (45)      |
|                     |     | RMSE                | 17975 (120) | 21918 (126)    |
|                     | 300 | MAE                 | 8574 (28)   | 9822 (46)      |
|                     |     | RMSE                | 17895 (105) | 22285 (114)    |
|                     | 400 | MAE                 | 8562 (27)   | 9861 (45)      |
|                     |     | RMSE                | 17853 (99)  | 22557 (109)    |

**Supplementary Table 4. Accuracy and runtime for different ASMC time discretizations.** We report the average performance of ASMC for the mean absolute error (MAE) and the root mean squared error (RMSE) for different numbers of time discretization bins across 10 simulations for sequencing data. Runtime is the average number of minutes to decode all pairwise combinations of 200 haplotypes in batches of 100 pairs across the 10 simulations. Numbers in round brackets represent standard errors.

|                |                   | CoalNN | ASMC mean posterior | ASMC MAP    |             |
|----------------|-------------------|--------|---------------------|-------------|-------------|
| <b>Imputed</b> | panel size = 300  | MAE    | 10138 (79)          | 9996 (80)   | 11253 (80)  |
|                |                   | RMSE   | 21094 (158)         | 20908 (167) | 24265 (149) |
|                | panel size = 1000 | MAE    | 9234 (57)           | 9206 (54)   | 10482 (65)  |
|                |                   | RMSE   | 19476 (132)         | 19433 (150) | 23259 (139) |
|                | panel size = 2000 | MAE    | 8861 (84)           | 8911 (76)   | 10121 (84)  |
|                |                   | RMSE   | 18689 (164)         | 18768 (161) | 22600 (147) |

**Supplementary Table 5. Accuracy of pairwise TMRCA prediction in imputed data.** We report the average performance in generations of CoalNN and ASMC for the mean absolute error (MAE) and the root mean squared error (RMSE) across 10 simulations. The reported performance is obtained by using the CoalNN sequencing weights and rounding the imputed allele dosages to binarize them. Numbers in round brackets represent standard errors. Reference panel sizes are in haploid units.



| GC rate              |      | CoalNN with GC | CoalNN without GC | ASMC mean posterior |
|----------------------|------|----------------|-------------------|---------------------|
| 0                    | MAE  | NA (NA)        | 7982 (32)         | 8166 (27)           |
|                      | RMSE | NA (NA)        | 13518 (73)        | 13262 (49)          |
| $1.0 \times 10^{-8}$ | MAE  | 7901 (42)      | 8588 (27)         | 8897 (27)           |
|                      | RMSE | 13540 (72)     | 14610 (58)        | 14547 (61)          |
| $2.0 \times 10^{-8}$ | MAE  | 8568 (22)      | 9141 (48)         | 9518 (51)           |
|                      | RMSE | 14767 (48)     | 15467 (64)        | 15484 (62)          |
| $3.0 \times 10^{-8}$ | MAE  | 8881 (46)      | 9622 (30)         | 10000 (32)          |
|                      | RMSE | 15160 (67)     | 16178 (43)        | 16205 (47)          |
| $4.0 \times 10^{-8}$ | MAE  | 9527 (32)      | 9978 (36)         | 10399 (36)          |
|                      | RMSE | 15958 (61)     | 16633 (59)        | 16699 (56)          |

**Supplementary Table 6. Accuracy of pairwise TMRCA prediction for different non-crossover gene conversion rates.** We report the average performance of CoalNN and ASMC mean posterior, in generations, using the mean absolute error (MAE) and the root mean squared error (RMSE). Simulations involve a constant effective population size of 10,000 diploid individuals, a constant recombination rate of  $10^{-8}$  per base pair per generation, and different values of non-crossover gene conversion rate. Numbers in round brackets represent standard errors. Numbers in round brackets represent standard errors.

|           | AND gate       | XOR gate       |
|-----------|----------------|----------------|
| Channel 1 | 0.035 (0.001)  | -0.009 (0.001) |
| Channel 2 | 0.024 (0.000)  | -0.056 (0.001) |
| Channel 3 | -0.008 (0.001) | 0.017 (0.001)  |
| Channel 4 | 0.014 (0.000)  | 0.002 (0.000)  |
| Channel 5 | -0.232 (0.001) | -0.016 (0.001) |
| Channel 6 | -0.051 (0.000) | 0.08 (0.001)   |
| Channel 7 | -0.272 (0.001) | -0.172 (0.001) |
| Channel 8 | -0.057 (0.000) | 0.101 (0.001)  |

**Supplementary Table 7. Recovery of the AND/XOR features from raw haplotypes.** Pearson correlation coefficient between the XOR/AND functions calculated on the raw haplotypes and the 8 channels of output of the first ConvBlock (see Methods). The numbers in brackets are standard errors calculated over 20 simulations.

| DAF bin (%) | Number of dated variants |           |           |           |           | Median age (generations) |              |              |              |              |
|-------------|--------------------------|-----------|-----------|-----------|-----------|--------------------------|--------------|--------------|--------------|--------------|
|             | AFR                      | AMR       | EAS       | EUR       | SAS       | AFR                      | AMR          | EAS          | EUR          | SAS          |
| [0, 0.5]    | 5,156,014                | 2,248,935 | 1,819,869 | 1,648,497 | 2,159,787 | 2,160 (34)               | 1,570 (16)   | 1,045 (38)   | 960 (16)     | 927 (61)     |
| [0.5, 1]    | 2,762,406                | 1,884,075 | 1,191,727 | 1,358,230 | 1,493,628 | 3,564 (53)               | 3,071 (53)   | 1,703 (25)   | 1,137 (9)    | 1,066 (16)   |
| [1, 2.5]    | 3,082,203                | 1,923,613 | 913,021   | 1,181,402 | 1,384,546 | 4,904 (53)               | 4,852 (64)   | 2,634 (27)   | 1,593 (20)   | 1,517 (29)   |
| [2.5, 5]    | 2,333,277                | 918,075   | 646,257   | 848,596   | 846,087   | 7,138 (65)               | 7,620 (67)   | 7,089 (93)   | 4,593 (62)   | 5,041 (47)   |
| [5, 10]     | 2,028,081                | 958,302   | 736,868   | 904,633   | 930,768   | 1,0581 (71)              | 11,303 (82)  | 10,395 (79)  | 8,046 (48)   | 8,187 (48)   |
| [10, 25]    | 2,350,274                | 1,536,898 | 1,321,044 | 1,479,233 | 1,547,460 | 17,193 (84)              | 17,737 (67)  | 13,441 (56)  | 12,138 (40)  | 11,802 (40)  |
| [25, 50]    | 1,523,362                | 1,404,734 | 1,312,117 | 1,377,671 | 1,420,932 | 28,476 (95)              | 2,6709 (123) | 17,970 (93)  | 18,847 (83)  | 17,873 (83)  |
| [50, 100]   | 2,057,347                | 2,184,241 | 1,954,993 | 2,015,680 | 1,979,944 | 43,636 (153)             | 44,824 (201) | 28,261 (198) | 29,741 (150) | 31,261 (172) |

**Supplementary Table 8. Median age of dated variants among different population groups.** We report the number of variants dated by CoalNN and their median age in generations stratified by derived allele frequency (DAF) as observed within a given population group. We only considered non-singleton polymorphic variants for which high-confidence ancestral information was available (Paten et al., 2008). Numbers in round brackets represent standard errors obtained by bootstrapping (see Methods).

| Derived allele frequency bin (%) | Number of dated variants |         |           | Median age (generations) |              |              |
|----------------------------------|--------------------------|---------|-----------|--------------------------|--------------|--------------|
|                                  | CEU                      | CHS     | YRI       | CEU                      | CHS          | YRI          |
| [0.5, 1]                         | N.A                      | 516,114 | 1,477,617 | N.A                      | 628 (17)     | 3,818 (34)   |
| [1, 2.5]                         | 1,101,465                | 510,236 | 2,243,382 | 701 (18)                 | 599 (17)     | 4,762 (33)   |
| [2.5, 5]                         | 44,8342                  | 253,321 | 1,638,788 | 1,023 (20)               | 907 (30)     | 6,795 (34)   |
| [5, 10]                          | 225,484                  | 147,593 | 1,374,079 | 2,203 (73)               | 2,165 (138)  | 9,438 (39)   |
| [10, 25]                         | 94,380                   | 83,756  | 833,036   | 7,761 (314)              | 9,092 (418)  | 13,901 (57)  |
| [25, 50]                         | 7,934                    | 12,096  | 118,731   | 13,850 (574)             | 17,104 (727) | 22,201 (175) |
| [50, 100]                        | 58,060                   | 53,894  | 423,917   | 60,023 (719)             | 59,019 (493) | 49,115 (215) |

**Supplementary Table 9. Median age of variants among different populations dated by CoalNN trained on a demographic prior of constant size.** We report the number of variants dated by CoalNN trained on a constant population size ( $N_e = 20,000$ ) and their median age in generations, stratified by derived allele frequency as observed within CEU, CHS or YRI. Only variants that remained polymorphic within each population were considered. Singletons were not included. Numbers in round brackets represent standard errors obtained by bootstrapping (see Methods). N.A denotes the absence of dated variant within the derived allele frequency bin for the corresponding population.

|                | DAF bin (%) | Number of dated variants |       |       |       |       | Median age (generations) |              |              |              |              |
|----------------|-------------|--------------------------|-------|-------|-------|-------|--------------------------|--------------|--------------|--------------|--------------|
|                |             | AFR                      | AMR   | EAS   | EUR   | SAS   | AFR                      | AMR          | EAS          | EUR          | SAS          |
| Benign         | [0, 1]      | 60243                    | 40505 | 36714 | 41811 | 21027 | 1083 (24)                | 812 (10)     | 741 (36)     | 524 (10)     | 510 (19)     |
|                | [1, 2.5]    | 7573                     | 4742  | 2655  | 3384  | 3181  | 4187 (107)               | 3115 (142)   | 2311 (44)    | 1391 (21)    | 1416 (56)    |
|                | [2.5, 5]    | 5277                     | 2217  | 1590  | 2185  | 2005  | 6364 (80)                | 5385 (313)   | 4807 (390)   | 2743 (126)   | 4004 (176)   |
|                | [5, 10]     | 4215                     | 2098  | 1632  | 2028  | 2053  | 10116 (181)              | 9433 (312)   | 8917 (261)   | 6730 (242)   | 6868 (182)   |
|                | [10, 50]    | 7264                     | 5876  | 5233  | 5724  | 5837  | 19695 (243)              | 19293 (329)  | 13908 (190)  | 13168 (188)  | 12956 (189)  |
|                | [50, 100]   | 3949                     | 4367  | 3802  | 3997  | 3807  | 40953 (301)              | 41976 (444)  | 25168 (423)  | 27154 (441)  | 28143 (402)  |
| Poss. damaging | [0, 1]      | 17193                    | 11322 | 11085 | 13094 | 5926  | 949 (24)                 | 720 (11)     | 709 (32)     | 510 (11)     | 480 (23)     |
|                | [1, 2.5]    | 1725                     | 1100  | 685   | 829   | 794   | 3908 (116)               | 2204 (178)   | 2123 (70)    | 1284 (39)    | 1243 (34)    |
|                | [2.5, 5]    | 1042                     | 480   | 351   | 510   | 439   | 5952 (244)               | 3812 (435)   | 4394 (505)   | 2255 (224)   | 3787 (457)   |
|                | [5, 10]     | 760                      | 440   | 331   | 381   | 400   | 9055 (305)               | 7948 (412)   | 8509 (609)   | 6161 (390)   | 6096 (358)   |
|                | [10, 50]    | 1018                     | 816   | 777   | 804   | 823   | 18243 (365)              | 17221 (578)  | 12037 (431)  | 11993 (421)  | 11295 (447)  |
|                | [50, 100]   | 130                      | 174   | 211   | 172   | 174   | 38587 (970)              | 33168 (2346) | 20898 (925)  | 22610 (1776) | 24821 (1798) |
| Prob. damaging | [0, 1]      | 22284                    | 15063 | 16221 | 19044 | 7941  | 846 (18)                 | 675 (10)     | 677 (30)     | 511 (11)     | 445 (22)     |
|                | [1, 2.5]    | 1803                     | 1145  | 696   | 975   | 878   | 3362 (135)               | 1719 (108)   | 2036 (65)    | 1226 (38)    | 1262 (49)    |
|                | [2.5, 5]    | 1067                     | 425   | 375   | 440   | 419   | 5433 (179)               | 3390 (396)   | 3193 (230)   | 1816 (171)   | 2211 (289)   |
|                | [5, 10]     | 703                      | 409   | 283   | 364   | 410   | 8963 (373)               | 6391 (538)   | 6673 (794)   | 5148 (468)   | 5190 (389)   |
|                | [10, 50]    | 810                      | 694   | 678   | 694   | 654   | 17500 (444)              | 16570 (692)  | 12561 (420)  | 12095 (510)  | 11993 (369)  |
|                | [50, 100]   | 100                      | 131   | 170   | 136   | 146   | 34742 (1125)             | 31530 (2180) | 19270 (1157) | 20549 (1538) | 22579 (1657) |

**Supplementary Table 10. Median age of variants among different population groups annotated by PolyPhen-2.** We report the number of annotated variants by PolyPhen-2 dated by CoalNN and their median age in generations, stratified by derived allele frequency (DAF) as observed within a given population group.

|             | DAF bin (%) | Number of dated variants |       |       |       |       | Median age (generations) |              |             |             |              |
|-------------|-------------|--------------------------|-------|-------|-------|-------|--------------------------|--------------|-------------|-------------|--------------|
|             |             | AFR                      | AMR   | EAS   | EUR   | SAS   | AFR                      | AMR          | EAS         | EUR         | SAS          |
| Tolerated   | [0, 1]      | 63965                    | 42999 | 39319 | 45297 | 22214 | 1059 (22)                | 797 (9)      | 733 (32)    | 523 (11)    | 505 (16)     |
|             | [1, 2.5]    | 7838                     | 4929  | 2754  | 3578  | 3366  | 4113 (91)                | 3058 (140)   | 2284 (45)   | 1388 (26)   | 1407 (49)    |
|             | [2.5, 5]    | 5352                     | 2275  | 1673  | 2263  | 2030  | 6335 (115)               | 5443 (323)   | 4453 (364)  | 2807 (123)  | 3952 (201)   |
|             | [5, 10]     | 4262                     | 2169  | 1637  | 2049  | 2151  | 9946 (159)               | 9236 (264)   | 8912 (271)  | 6677 (269)  | 6689 (212)   |
|             | [10, 50]    | 7290                     | 5859  | 5314  | 5723  | 5870  | 19505 (197)              | 19150 (328)  | 13741 (157) | 13042 (169) | 12804 (167)  |
|             | [50, 100]   | 3900                     | 4346  | 3772  | 3958  | 3777  | 40922 (324)              | 41934 (463)  | 25187 (489) | 27256 (442) | 28157 (402)  |
| Deleterious | [0, 1]      | 36868                    | 24710 | 25536 | 29613 | 13149 | 900 (18)                 | 698 (9)      | 698 (34)    | 510 (10)    | 467 (22)     |
|             | [1, 2.5]    | 3361                     | 2121  | 1341  | 1685  | 1559  | 3716 (112)               | 1925 (91)    | 2154 (47)   | 1247 (29)   | 1222 (33)    |
|             | [2.5, 5]    | 2127                     | 870   | 678   | 912   | 859   | 5761 (155)               | 3489 (259)   | 3954 (325)  | 1890 (128)  | 2923 (184)   |
|             | [5, 10]     | 1438                     | 823   | 634   | 759   | 758   | 9243 (253)               | 7474 (425)   | 7638 (525)  | 5570 (360)  | 6267 (333)   |
|             | [10, 50]    | 1878                     | 1563  | 1414  | 1532  | 1481  | 18326 (332)              | 17349 (428)  | 12800 (318) | 12449 (337) | 12143 (262)  |
|             | [50, 100]   | 294                      | 370   | 451   | 384   | 391   | 36896 (1064)             | 32819 (1539) | 20601 (507) | 21681 (889) | 23579 (1261) |

**Supplementary Table 11.** Median age of variants among different population groups annotated by SIFT. We report the number of variants annotated by SIFT dated by CoalNN and their median age in generations, stratified by derived allele frequency (DAF) as observed within a given population group.

| Annotation           | Effect size $\tau^*$ not including CoalNN | Effect size $\tau^*$ including CoalNN |                |                |                |                |
|----------------------|-------------------------------------------|---------------------------------------|----------------|----------------|----------------|----------------|
|                      |                                           | AFR                                   | AMR            | EAS            | EUR            | SAS            |
| CoalNN               | N.A                                       | -0.219 (0.019)                        | -0.174 (0.019) | -0.184 (0.019) | -0.148 (0.018) | -0.187 (0.019) |
| LLD-AFR              | -0.271 (0.004)                            | -0.267 (0.004)                        | -0.269 (0.004) | -0.268 (0.004) | -0.269 (0.004) | -0.268 (0.004) |
| Recombination rate   | -0.370 (0.006)                            | -0.367 (0.006)                        | -0.369 (0.006) | -0.369 (0.006) | -0.369 (0.006) | -0.368 (0.006) |
| Nucleotide diversity | -0.051 (0.005)                            | -0.046 (0.005)                        | -0.050 (0.005) | -0.048 (0.005) | -0.050 (0.005) | -0.049 (0.005) |
| B-statistic          | 0.090 (0.004)                             | 0.089 (0.004)                         | 0.089 (0.004)  | 0.089 (0.004)  | 0.089 (0.004)  | 0.089 (0.004)  |
| CpG content          | 0.321 (0.006)                             | 0.321 (0.006)                         | 0.321 (0.006)  | 0.321 (0.006)  | 0.321 (0.006)  | 0.321 (0.006)  |
| ASMC <sub>avg</sub>  | -0.294 (0.004)                            | -0.292 (0.004)                        | -0.292 (0.004) | -0.291 (0.004) | -0.293 (0.004) | -0.292 (0.004) |

**Supplementary Table 12. S-LDSC analysis of CoalNN annotation on population groups.**  $\tau^*$  estimates (meta-analysed across 63 independent diseases and complex traits) of CoalNN MAF-adjusted allele age annotation on each population group (AFR, AMR, EAS, EUR and SAS) in independent marginal S-LDSC analyses conditioned on 96 baseline annotations (the full baseline model except for ARGweaver). We also report effect sizes of Baseline-LD evolutionary annotations (level of LD measured in African populations LLD-AFR, recombination rate, nucleotide diversity, *B*-statistic (McVicker et al., 2009), CpG content (Zhang et al., 2021) and average pairwise TMRCA ASMC<sub>avg</sub> (Palamara et al., 2018)), before and after the introduction of the allele age annotation.

|     | ARGweaver allele age | ASMC <sub>avg</sub> | B-statistic | CpG content  | LLD-AFR  | Nucleotide diversity | Recombination rate |
|-----|----------------------|---------------------|-------------|--------------|----------|----------------------|--------------------|
| ACB | 0.64462              | 0.28373             | -0.0449627  | -0.0068927   | 0.357883 | 0.193833             | -0.0115892         |
| ASW | 0.637648             | 0.262087            | -0.0511699  | 0.0073261    | 0.308689 | 0.175725             | 0.0188068          |
| BEB | 0.566617             | 0.25335             | -0.0249983  | -0.0177649   | 0.315825 | 0.139136             | -0.0245286         |
| CDX | 0.461265             | 0.273944            | -0.0317672  | -0.0211324   | 0.248805 | 0.143154             | -0.0212694         |
| CEU | 0.599494             | 0.321749            | -0.0459838  | -0.0102032   | 0.314191 | 0.168587             | -0.0112538         |
| CHB | 0.532193             | 0.31198             | -0.0411218  | -0.0324496   | 0.291585 | 0.166983             | -0.0367068         |
| CHS | 0.462519             | 0.28222             | -0.0184473  | -0.0334043   | 0.331941 | 0.183432             | -0.0848482         |
| CLM | 0.624238             | 0.29408             | -0.0219222  | -0.0232567   | 0.379901 | 0.181055             | -0.0551782         |
| ESN | 0.545247             | 0.268409            | -0.0438037  | 0.00498154   | 0.253668 | 0.187784             | 0.0165792          |
| FIN | 0.565649             | 0.294069            | -0.00533878 | -0.0418206   | 0.38372  | 0.143829             | -0.0882545         |
| GBR | 0.597827             | 0.302148            | -0.0403849  | -0.00995346  | 0.308844 | 0.151967             | -0.0144756         |
| GIH | 0.527073             | 0.244278            | 0.0185592   | -0.0524937   | 0.405602 | 0.129283             | -0.0885153         |
| GWD | 0.58232              | 0.260541            | -0.0263054  | 0.000694733  | 0.2974   | 0.174894             | -0.0206123         |
| IBS | 0.519219             | 0.276006            | -0.0430249  | -0.000972771 | 0.252918 | 0.12374              | 0.0289131          |
| ITU | 0.585557             | 0.305872            | -0.0515937  | -0.0102396   | 0.311108 | 0.182995             | 0.00317832         |
| JPT | 0.489656             | 0.282032            | -0.0326494  | -0.026941    | 0.275463 | 0.158177             | -0.0352778         |
| KHV | 0.507532             | 0.253314            | -0.0239953  | -0.0244129   | 0.267331 | 0.125592             | -0.0289965         |
| LWK | 0.584643             | 0.260102            | -0.0550596  | 0.0119386    | 0.235916 | 0.178538             | 0.0261056          |
| MSL | 0.539203             | 0.243146            | -0.0455326  | 0.0163128    | 0.214835 | 0.16732              | 0.0288875          |
| MXL | 0.59563              | 0.2825              | -0.0410389  | -0.0051117   | 0.312468 | 0.158115             | 0.000506131        |
| PEL | 0.59611              | 0.275924            | -0.0391656  | -0.00776521  | 0.314023 | 0.15596              | -0.00922475        |
| PJL | 0.580811             | 0.293767            | -0.057732   | 0.00708515   | 0.268913 | 0.167449             | 0.0398443          |
| PUR | 0.615749             | 0.274605            | -0.0522987  | 0.0173573    | 0.283352 | 0.172801             | 0.0367664          |
| STU | 0.585506             | 0.265688            | -0.0169196  | -0.0237441   | 0.334048 | 0.159808             | -0.0349042         |
| TSI | 0.592384             | 0.303182            | -0.0535334  | -0.0155446   | 0.296478 | 0.154585             | 0.00063352         |
| YRI | 0.550575             | 0.262261            | -0.0448539  | 0.00265146   | 0.254752 | 0.185644             | 0.00491168         |

**Supplementary Table 13. Correlation between MAF-stratified CoalNN allele age annotation and other evolutionary annotations.** We report correlations computed on common SNPs ( $MAF \geq 5\%$ ) between each of the 26 population specific MAF-adjusted CoalNN annotations and evolutionary annotations from the Baseline-LD model. ARGweaver allele age, ASMC<sub>avg</sub>, and LLD-AFR annotations were also MAF-stratified.



**a**

| Annotation           | Effect size $\tau^*$ not including CoalNN | Effect size $\tau^*$ including CoalNN |
|----------------------|-------------------------------------------|---------------------------------------|
| CoalNN               | N.A                                       | -0,218 (0,018)                        |
| LLD-AFR              | -0,271 (0,004)                            | -0,268 (0,004)                        |
| Recombination rate   | -0,370 (0,006)                            | -0,368 (0,006)                        |
| Nucleotide diversity | -0,051 (0,005)                            | -0,048 (0,005)                        |
| B-statistic          | 0,090 (0,004)                             | 0,089 (0,004)                         |
| CpG content          | 0,321 (0,006)                             | 0,321 (0,006)                         |
| ASMC <sub>avg</sub>  | -0,294 (0,004)                            | -0,291 (0,004)                        |

**b**

| Annotation           | Effect size $\tau^*$ not including ARGweaver | Effect size $\tau^*$ including ARGweaver |
|----------------------|----------------------------------------------|------------------------------------------|
| ARGweaver            | N.A                                          | -0.147 (0.005)                           |
| LLD-AFR              | -0.271 (0.004)                               | -0.241 (0.004)                           |
| Recombination rate   | -0.370 (0.006)                               | -0.348 (0.006)                           |
| Nucleotide diversity | -0.051 (0.005)                               | -0.039 (0.005)                           |
| B-statistic          | 0.090 (0.004)                                | 0.083 (0.004)                            |
| CpG content          | 0.321 (0.006)                                | 0.314 (0.006)                            |
| ASMC <sub>avg</sub>  | -0.294 (0.004)                               | -0.249 (0.004)                           |

**Supplementary Table 14. S-LDSC analysis of predicted allele age annotations.** Numerical values from Fig. 5b. Effect size  $\tau^*$  estimates (meta-analysed across 63 independent diseases and traits) of CoalNN MAF-adjusted allele age annotation on all 26 populations (in **a**) and of ARGweaver MAF-adjusted allele age annotation (in **b**), in marginal S-LDSC analysis conditioned on 96 baseline annotations (the full Baseline-LD model except for ARGweaver). We also report effect sizes of Baseline-LD evolutionary annotations (level of LD measured in African populations LLD-AFR, recombination rate, nucleotide diversity, *B*-statistic (McVicker et al., 2009), CpG content (Zhang et al., 2021) and average pairwise TMRCA ASMC<sub>avg</sub> (Palamara et al., 2018)), before and after the introduction of the allele age annotation.

## Supplementary References

- Adzhubei, I. A., Schmidt, S., Peshkin, L., Ramensky, V. E., Gerasimova, A., Bork, P., Kondrashov, A. S., and Sunyaev, S. R. (2010). A method and server for predicting damaging missense mutations. *Nature methods*, 7(4):248–249.
- Byrska-Bishop, M., Evani, U. S., Zhao, X., Basile, A. O., Abel, H. J., Regier, A. A., Corvelo, A., Clarke, W. E., Musunuri, R., Nagulapalli, K., et al. (2022). High-coverage whole-genome sequencing of the expanded 1000 genomes project cohort including 602 trios. *Cell*, 185(18):3426–3440.
- Gazal, S., Weissbrod, O., Hormozdiari, F., Dey, K., Nasser, J., Jagadeesh, K., Weiner, D., Shi, H., Fulco, C., O’Connor, L., et al. (2021). Combining snp-to-gene linking strategies to pinpoint disease genes and assess disease omnigenicity. *medRxiv*.
- McVicker, G., Gordon, D., Davis, C., and Green, P. (2009). Widespread genomic signatures of natural selection in hominid evolution. *PLoS genetics*, 5(5):e1000471.
- Palamara, P. F., Terhorst, J., S. Song, Y., and L. Price, A. (2018). High-throughput inference of pairwise coalescence times identifies signals of selection and enriched disease heritability. *Nature Genetics*, 50.
- Paten, B., Herrero, J., Beal, K., Fitzgerald, S., and Birney, E. (2008). Enredo and pecan: genome-wide mammalian consistency-based multiple alignment with paralogs. *Genome research*, 18(11):1814–1828.
- Shrikumar, A., Greenside, P., Shcherbina, A., and Kundaje, A. (2016). Not just a black box: Learning important features through propagating activation differences. *arXiv preprint arXiv:1605.01713*.
- Sim, N.-L., Kumar, P., Hu, J., Henikoff, S., Schneider, G., and Ng, P. C. (2012). Sift web server: predicting effects of amino acid substitutions on proteins. *Nucleic acids research*, 40(W1):W452–W457.
- Simonyan, K., Vedaldi, A., and Zisserman, A. (2014). Deep inside convolutional networks: Visualising image classification models and saliency maps. In *Workshop at International Conference on Learning Representations*.
- Spence, J. P. and Song, Y. S. (2019). Inference and analysis of population-specific fine-scale recombination maps across 26 diverse human populations. *Science Advances*, 5(10):eaaw9206.
- Terhorst, J., Kamm, J. A., and Song, Y. S. (2017). Robust and scalable inference of population history from hundreds of unphased whole genomes. *Nature Genetics*, 49(2):303–309.
- Yu, F. and Koltun, V. (2015). Multi-scale context aggregation by dilated convolutions. *arXiv preprint arXiv:1511.07122*.
- Zeiler, M. D. and Fergus, R. (2014). Visualizing and understanding convolutional networks. In Fleet, D., Pajdla, T., Schiele, B., and Tuytelaars, T., editors, *Computer Vision – ECCV 2014*, pages 818–833, Cham. Springer International Publishing.
- Zhang, L., Dai, Z., Yu, J., and Xiao, M. (2021). CpG-island-based annotation and analysis of human housekeeping genes. *Briefings in bioinformatics*, 22(1):515–525.
